# Supplementary material for: Essentiality and Transcriptome-Enriched Pathway Scores Predict Drug-Combination Synergy
Source: Biology (Basel). 2020 Sep 7;9(9):278. doi: 10.3390/biology9090278 (PMC7565142; doi:10.3390/biology9090278)
Supplement: Supplementary file 1 [file biology-09-00278-s001.xlsx]

## Sheet: essentiality_results
gene_symbol	overall_p
MED4	8.19862e-08
FGF14	7.04127e-07
SEPHS1	1.7616e-06
VAV3	1.78151e-06
FOS	2.81108e-06
CENPL	3.80322e-06
GART	3.81973e-06
IL36B	3.93649e-06
FYN	4.43546e-06
PRAMEF22	4.76339e-06
GPR45	5.62763e-06
ARHGAP5	5.83511e-06
ARHGAP31	6.32524e-06
SYNJ2BP.COX16	6.43028e-06
ARCN1	8.18506e-06
AIM2	8.45433e-06
TIMP3	8.54327e-06
ARFRP1	9.6467e-06
PKN2	1.01241e-05
HAS2	1.10861e-05
PAX9	1.11735e-05
MRPS21	1.14624e-05
CYB5R3	1.20427e-05
ANKRD33B	1.3036e-05
EP300	1.42992e-05
DCAF13P3	1.5435e-05
GEMIN7	1.57311e-05
PSMD4	1.79728e-05
MED21	1.87338e-05
PHF13	1.91015e-05
BRI3	2.02443e-05
SELENOH	2.05807e-05
JDP2	2.19696e-05
ASRGL1	2.36905e-05
EPS8L1	2.36926e-05
BEGAIN	2.41683e-05
TRAM1L1	2.51149e-05
ANAPC10	2.59178e-05
EIF4A3	2.72155e-05
DKC1	2.85218e-05
GPN1	2.89486e-05
GAS2L1	2.98244e-05
NIFK	3.15088e-05
RLN3	3.21864e-05
PKDCC	3.31016e-05
TJP3	3.35305e-05
ZKSCAN4	3.36593e-05
COPS7B	3.45331e-05
PAX8	3.56201e-05
CNIH4	3.65991e-05
RACGAP1	3.67876e-05
ZFAND5	3.688e-05
ITGAX	3.69745e-05
PTPN5	3.7014e-05
SLC15A1	3.91992e-05
FNDC4	3.94667e-05
TMEM170B	3.97447e-05
PPP2CA	4.05221e-05
XPR1	4.09507e-05
PRPF31	4.11972e-05
GCG	4.27473e-05
CKMT2	4.29898e-05
RPL10	4.53464e-05
IGFL1	4.54707e-05
WDR6	4.59984e-05
STARD13	4.67978e-05
AGAP2	4.75098e-05
BHLHE40	4.79711e-05
C5orf52	4.8281e-05
NSF	5.115e-05
FRMD6	5.15015e-05
SMNDC1	5.18471e-05
TYK2	5.2922e-05
ARID3B	5.3148e-05
DSCR3	5.31758e-05
IDO2	5.51753e-05
HSD11B1L	5.60375e-05
RHNO1	5.69756e-05
RBM25	5.75736e-05
UCK1	5.8617e-05
MLF2	5.92321e-05
UTP11	5.92509e-05
EIF6	5.99341e-05
OR1E2	6.01891e-05
TXNDC16	6.08831e-05
HNRNPH1	6.11703e-05
FGFBP1	6.30546e-05
POLRMT	6.8133e-05
EML2	6.84326e-05
MAG	7.00852e-05
STXBP2	7.02606e-05
FANCG	7.19725e-05
TMEM267	7.20402e-05
PES1	7.36652e-05
MCL1	7.38011e-05
CNTN2	7.43072e-05
DIAPH1	7.55417e-05
CSDE1	7.59607e-05
CREBBP	7.61662e-05
SRPK1	7.62317e-05
WNT7B	7.6435e-05
USMG5	7.72798e-05
DNM3	7.74332e-05
SLC38A7	7.74366e-05
CLTB	7.74851e-05
OR2H1	7.76923e-05
S1PR2	7.78478e-05
WNT16	7.96562e-05
RPL27A	8.0559e-05
NLN	8.11492e-05
PEX16	8.12542e-05
ELAVL2	8.13932e-05
KIF5C	8.27494e-05
MAGOHB	8.29113e-05
PPAN.P2RY11	8.29573e-05
CTPS2	8.32547e-05
RRM2B	8.39311e-05
SENP3	8.39345e-05
RNF123	8.39502e-05
AURKAIP1	8.43942e-05
FAM9C	8.4678e-05
HIVEP2	8.52069e-05
TOMM7	8.53876e-05
APC	8.56957e-05
AGAP6	8.72091e-05
BTF3	8.74552e-05
IL20RB	8.80588e-05
CDCA5	8.8263e-05
RNF220	8.84453e-05
CALB1	8.92425e-05
ABCB9	9.01891e-05
SERAC1	9.09094e-05
NHP2	9.09722e-05
SLC41A2	9.1717e-05
PADI2	9.53452e-05
CELA3B	9.84866e-05
MMP24	9.85557e-05
BUB1B	9.86856e-05
THOP1	9.96371e-05
NR2E3	0.00010131
SMARCC1	0.000102306
LYNX1	0.00010239
TBC1D32	0.000102714
MAP2K1	0.000102864
FBLN2	0.000103031
FUNDC2	0.000103923
HDAC11	0.000104948
MED22	0.000105898
RPL7A	0.000106254
TIMM44	0.000106577
PRKG2	0.000108403
NOC4L	0.000108708
SMG6	0.000110226
HAO1	0.00011122
PRKAR1B	0.000111689
SAR1B	0.000112075
OR10G3	0.000113609
HSPB11	0.000113893
MBTPS1	0.000114571
SACM1L	0.000115152
IL1A	0.000115454
TMEM147	0.000115852
R3HDML	0.000115932
HIST1H2AC	0.000116633
RPS15	0.00011753
EXOC5	0.000120949
TBL1Y	0.000122565
SMARCD1	0.000123011
PPIL3	0.000123014
PPP2R2B	0.000124559
CLPP	0.000125616
RBM15	0.000126227
PRRX2	0.000126326
HSPD1	0.000131589
KIAA1549	0.000134655
SF3B2	0.00013592
OSTC	0.000136316
LYVE1	0.000137949
NCBP3	0.000138142
TMCC2	0.000139588
HUWE1	0.000140371
HNF1B	0.000142026
ECI2	0.000142099
IPO11	0.0001429
AURKA	0.0001429
COX7C	0.00014335
SLC8A1	0.000144606
NWD1	0.000144936
APCDD1L	0.000147014
MAFF	0.000147893
HOXB6	0.000148682
NDUFB5	0.000149953
CBX2	0.000151357
OSBPL2	0.00015389
SLC39A4	0.000154408
CHRDL1	0.000154477
UBL7	0.000156481
RAB4B	0.00015679
C7orf72	0.000157149
KLF16	0.000157218
MYBL2	0.000157524
TTC12	0.000159302
ATP6V1G3	0.000160466
THOC3	0.000161189
MAP2K7	0.000162449
NFS1	0.000162673
MYT1	0.000163127
PLPPR2	0.000164314
CAMK2G	0.000165224
CDC23	0.000165976
SYPL1	0.000166477
PCSK2	0.000166943
CHMP2B	0.000167078
SLU7	0.000171658
SCAP	0.000174169
MOB4	0.000174381
CERS6	0.00017596
PARL	0.000176077
PTGFR	0.000176718
RBMX2	0.000177188
RNASE11	0.000178038
ALDH1A2	0.000179958
ZNF534	0.000181976
MED20	0.000182249
FANCD2P2	0.000182568
SNAP25	0.000183954
PDCD2	0.000185153
SLC13A4	0.000185175
KANSL3	0.000186082
HMGCLL1	0.000186618
CDC73	0.000186964
SF3A3	0.000187087
RAD51C	0.000187957
HSPH1	0.000188387
FAU	0.000188445
POLR2G	0.000188652
EPB41L4A.AS1	0.000188832
BLOC1S5	0.000189685
MAP3K6	0.00019017
SUPV3L1	0.000190385
TOP2A	0.000192126
PRPH2	0.000192569
MAGEA6	0.000192748
ARHGAP9	0.000193759
RBCK1	0.000194082
ADGRB2	0.000194292
NUP214	0.000195037
LINC00523	0.0001974
E2F5	0.000198102
CCDC169	0.000199983
MTA2	0.000200405
KDELR2	0.000201007
CTNNB1	0.00020198
ELOA2	0.000203472
GSTZ1	0.000205627
SLC25A2	0.000207322
EFHD1	0.00021068
TAS2R50	0.000210893
IMP3	0.000211354
RAI14	0.000211447
NOXRED1	0.000211944
LHX2	0.000212099
PCDHGA6	0.00021476
TMPRSS6	0.000217
ZNF250	0.000218868
RPP40	0.000219764
CDC6	0.00022156
IRF4	0.000222273
COX6B1	0.000223104
HNRNPA1	0.000224117
KCTD18	0.000224415
CTSC	0.000224905
LEFTY1	0.00022496
IFNB1	0.000227246
NELFE	0.000227476
HIST2H2BC	0.000227925
AHNAK	0.000228006
IGFBP2	0.000228458
CD82	0.000228643
MPDU1	0.000231378
TXNDC12	0.000231483
MORF4L2	0.000231496
IFI6	0.000232552
PCDHA5	0.000233596
GARS	0.000234049
SMAD9	0.000234415
CHIA	0.00023493
MAST3	0.000236376
SERPINB3	0.000236772
USP51	0.000237181
PRPF4B	0.000238011
MCM6	0.000238296
NAA30	0.000240463
MAPRE1	0.000241053
ARSG	0.000242205
ANKRD11	0.00024296
PRDX6	0.000243805
TAC3	0.000244907
INHBB	0.000245401
B4GALT7	0.00024742
CHEK1	0.000248362
ZNF507	0.000249748
DDX46	0.000250472
LMOD3	0.00025204
MEGF11	0.000253403
KL	0.000254022
DNAJC8	0.000255933
PSMD14	0.000256026
RIPK3	0.000256057
CLCA1	0.000256273
SMOC1	0.000259733
TCOF1	0.000260302
B4GALT3	0.000262006
OR8G5	0.000262977
HACD4	0.000265265
IAH1	0.000265646
RFC3	0.000265882
GTF2A1L	0.000265999
CERS3	0.000266662
C8orf44.SGK3	0.000268212
NCF1	0.000268627
ZNF324B	0.000268719
ASAP3	0.000272106
AGAP12P	0.000272147
RPP30	0.000272543
SLC1A3	0.000272751
NFE2L1	0.00027378
WDR26	0.000273826
RHEB	0.000274411
LACTB	0.00027466
CTLA4	0.000275401
CPNE8	0.00027686
SPATA12	0.000277716
HPD	0.000281124
NUTF2	0.000282431
HDAC3	0.000284331
TXN	0.000285907
MAPK12	0.000287863
LRRC25	0.000287949
PLK1	0.000289347
KRT4	0.00028943
SAMD9	0.000290943
JPT1	0.000291322
AMOT	0.000292343
TRAPPC3	0.000295327
NCKAP1	0.000296265
TEKT5	0.000296922
DTX3	0.00029701
NELFB	0.000297229
ATP4A	0.000297474
MRPS33	0.000298738
TOPBP1	0.000300369
KIAA1524	0.000300674
YME1L1	0.000301358
BMS1	0.000302242
SLC9A3R1	0.000303674
ZW10	0.0003059
SLC22A13	0.00030613
CENPH	0.00030809
MED8	0.000308984
PALB2	0.000309308
BMF	0.000310042
EMC7	0.000310327
ATF4	0.000310455
MEIOB	0.000311285
PSMD6	0.000311353
DCX	0.000312016
VPS25	0.000312224
MYB	0.000313776
TNFRSF13B	0.000314016
BIRC8	0.000317044
PRKAG2	0.00031743
MTHFD1	0.000319108
ALYREF	0.000319787
SMC3	0.000319941
GNAO1	0.000320481
RPS11	0.000321392
FNBP4	0.000322298
WDR55	0.000322562
OIP5	0.000322852
RUVBL1	0.000322868
YBEY	0.000322928
RPS9	0.000323663
TBC1D10A	0.000324941
C1D	0.000326319
GAPVD1	0.000327054
KLLN	0.000327251
ATXN2L	0.000327809
RAG1	0.000330732
FBXO10	0.000331059
SLC9B2	0.00033227
UHRF1	0.000335141
PRH1	0.000335187
CAPZB	0.000336423
NEDD8.MDP1	0.000340169
CCT5	0.000341793
CTHRC1	0.000342592
JPH2	0.000342954
PRMT1	0.000344972
MPPED1	0.000345948
TP53I11	0.000346559
EPN2	0.000351282
NDST3	0.000351316
UXT	0.000351532
SCML2	0.000351933
NKX6.2	0.000356711
CTTN	0.000358692
DRAP1	0.00036004
X9.Mar	0.000360609
WBP2	0.000360712
PRKRA	0.000360822
HPS5	0.000360842
NAB1	0.000361495
JOSD1	0.00036463
FAM126A	0.000364699
BIRC3	0.000365908
FBXO22	0.00036808
ZFPM1	0.00036823
RNF25	0.00036875
BTRC	0.000368894
USP32P2	0.000369359
PPP1R8	0.000369513
YIF1B	0.000369736
ARNT	0.000370209
CSRP2	0.000371149
ARGLU1	0.000371501
RASAL1	0.000371703
CRK	0.000373068
CD99L2	0.00037331
LCN6	0.00037422
OR5M1	0.000375511
ABCC4	0.000375666
ATOX1	0.000376221
AVPI1	0.000377606
THNSL2	0.000380504
NUBPL	0.000381049
C1QL4	0.000381367
CDK1	0.000383419
FOXN1	0.000384496
RPL5	0.000385156
GABRP	0.000385256
POMK	0.000386139
TM9SF3	0.000387549
ACVR1B	0.000388563
ATIC	0.000388974
NAA10	0.000390045
RUFY3	0.000391981
CEBPZ	0.000392594
NEU3	0.000395125
GALNT11	0.00039542
NOP58	0.00039587
CAPG	0.00039777
ATP5G3	0.000399087
UGT2B4	0.000401655
IMPDH2	0.000401712
GBA	0.000401875
LCLAT1	0.000402806
SIRT4	0.000402992
DKK2	0.00040406
SULT6B1	0.000407909
SLC18A1	0.000409891
PPP2R2A	0.000409933
FRMPD4	0.000410099
NSMCE1	0.000411225
LAMC1	0.000414261
ACTA2	0.000415206
MRPL36	0.000416959
TBRG4	0.000419215
TUBGCP3	0.000419356
NUMA1	0.000419557
PDP2	0.000420076
EIF4E	0.00042047
LMBR1	0.000420814
ASIC2	0.000420848
AATF	0.000421238
NUDC	0.000421933
HEATR3	0.000422591
GH2	0.000424058
DCAF1	0.000424293
X1.Dec	0.000424484
CORO2B	0.00042456
SSH1	0.000430462
ATP5H	0.000431997
SOS1	0.000432085
ZFR	0.000432265
CPT2	0.000434013
ADA	0.000434455
EEF2	0.000434702
GRAMD1A	0.00043486
PSKH1	0.000434877
IGFN1	0.000437287
TMEM100	0.000437852
ZNF189	0.00043848
CTCF	0.000439808
TARDBP	0.000441865
RRP1B	0.000445528
CLEC5A	0.000446304
ZNRF1	0.000446676
CHRM1	0.00044835
DUSP2	0.000449767
NPBWR2	0.000450476
HIP1	0.00045064
TUBG1	0.000451584
EIF3B	0.00045178
POU2F1	0.000451943
ARL5B	0.000452515
CDC25B	0.000452846
CARTPT	0.000453211
CLIC6	0.000453503
MTMR8	0.000455189
MAGOH	0.000455474
SUMO2	0.000457144
PPP2R1A	0.000457597
UBE2DNL	0.000460181
PQBP1	0.000461143
NKTR	0.000462688
NAA50	0.000464004
GALNT14	0.000465259
FAM162A	0.000465994
SLC51B	0.000466312
EIF5	0.000466631
EIF2S1	0.000467175
TUBGCP4	0.000467195
GEM	0.000468969
OR52A5	0.000470366
TCF7	0.00047187
GNRH2	0.000473442
OR2J1	0.000475022
OR7C2	0.000475049
TM4SF19.TCTEX1D2	0.000475477
AHRR	0.000476345
EBAG9	0.000479506
PALM3	0.000479562
EARS2	0.000479631
FAM200B	0.000479646
DPPA2	0.000480313
FDPS	0.000481126
TRIM69	0.000486259
CHAF1B	0.000487548
SCGB2A1	0.000488431
SNU13	0.000492123
RAB3B	0.000492472
ZBTB37	0.000492954
PARK7	0.000493762
INCENP	0.000495374
MED11	0.000495546
CACNG5	0.000495991
SEMA3G	0.000497432
SOD1	0.000499018
GNAI3	0.000499179
RFC4	0.000499235
DDX24	0.000499343
ADAMDEC1	0.000499906
TRAK2	0.000502758
SMG8	0.000505284
IDH3A	0.000506432
DPF3	0.000507353
SPIRE1	0.000508057
OR56B4	0.000510306
WDR82	0.00051358
ARL2BP	0.00052012
GEMIN5	0.000520684
CLP1	0.000521673
TMEM184C	0.000521944
MZF1	0.000522102
SNRPC	0.000523144
MCOLN2	0.000525885
SARDH	0.000526431
CHAD	0.000528768
PQLC1	0.000529888
EXT2	0.000536035
TSPAN7	0.000536691
KEAP1	0.000538993
USP4	0.000540593
HIGD2A	0.000541568
DCTN2	0.000543724
RPL18A	0.000544234
ATP1A1	0.000545604
RTN4RL2	0.000545807
DDX21	0.000547644
SIGLEC7	0.000548367
ABHD2	0.000550793
USP20	0.000551585
ZNF625.ZNF20	0.000551802
PIN1P1	0.000551939
GK2	0.000554686
SCN11A	0.000557152
KCMF1	0.000558415
HARS2	0.000559386
TTC27	0.000560088
C6orf52	0.000560936
TKT	0.000563695
KIF23	0.000564217
NSMCE3	0.000565051
POTEM	0.000566696
NUP58	0.00056825
BDH1	0.00056895
SRRT	0.000570175
CARD9	0.000570277
CTNNBIP1	0.000571353
DHX30	0.000573279
KMT2B	0.000573608
DTNBP1	0.000576514
IGLL3P	0.000577099
IPO5	0.000579018
WFIKKN1	0.000579215
GUCY1B2	0.000579579
OGDH	0.000580533
MTTP	0.000583099
NOX3	0.000583546
PTPRH	0.000584377
YWHAZ	0.000584413
DCT	0.000586647
COX5A	0.000588532
NEFH	0.000589195
SOX10	0.000589358
NAPA	0.000590515
FASTKD2	0.000595897
FIS1	0.00059734
UBA3	0.000597737
MSANTD3.TMEFF1	0.000598777
NCOA6	0.000599202
COPZ1	0.00060019
ACR	0.000602093
PLAUR	0.000602191
CSN1S1	0.000602463
IFNA6	0.000603532
ZNF385B	0.000603671
FERMT2	0.000604439
VPS37B	0.000610436
KCTD17	0.000611363
NFKB1	0.000611571
ITGAM	0.000611649
MDM4	0.000613088
ARID2	0.000614516
HLA.DRB6	0.000614709
ADARB1	0.000615034
MCEE	0.000619242
DSPP	0.000623285
HK2	0.000624299
RAX2	0.000624956
ZBTB8OS	0.000629834
TBC1D7	0.000631575
CEBPG	0.000631701
EZH1	0.000633367
ARL4C	0.000634483
RNASE8	0.000635227
RPS6KB1	0.000636256
PABPC3	0.000637783
DYRK3	0.00063826
FUBP1	0.000639144
CCDC180	0.000640971
ABLIM3	0.000641006
TEP1	0.000642415
C8G	0.000643193
TP53BP2	0.000648529
SRP19	0.000651884
DLK1	0.000652395
DPCR1	0.000653475
RAD51D	0.000654328
EIF2S3	0.000655212
WDR75	0.000655649
AKR1C2	0.000656045
GPR108	0.000658214
ST3GAL2	0.000660756
IL18BP	0.000660868
SIK3	0.000661675
TRIB3	0.000663628
GRIN3B	0.000664896
SLC24A1	0.000666119
CENPT	0.00066761
LRRC34	0.000667749
TTC21A	0.000669197
PPP1R12A	0.000670374
PROCR	0.000670664
EIF4B	0.000670726
BST1	0.000671271
IMMT	0.000672976
PIGU	0.000675355
CABP1	0.000675682
IL22	0.000675889
ACTL6A	0.000676969
PCED1A	0.000679162
NIP7	0.00068013
PROZ	0.000682064
ZSCAN9	0.00068232
ABCF1	0.000684169
CEP126	0.000686804
EBI3	0.000687621
SPRY1	0.000688834
CHD1	0.000690439
RPL30	0.000691823
LSM12	0.000692161
DOK2	0.000697462
GALNT2	0.000698194
NDUFA4L2	0.000699206
EPHB6	0.000700881
DYNLT3	0.000701902
PSMD13	0.000702276
ADGRA1	0.000702401
RNF125	0.000702892
KRT74	0.000704514
TLR3	0.000705048
ST6GAL2	0.000707948
RASGEF1B	0.000708135
CCNC	0.000708646
ATP2B1	0.00070914
PAQR8	0.000709638
RET	0.000709711
OSBPL1A	0.000710808
PI4KA	0.000717052
EAF2	0.000718978
UBASH3B	0.000719434
NUF2	0.000719881
CMPK1	0.000720993
RARB	0.00072135
CSE1L	0.000723378
NMRK2	0.00072414
SYT14	0.000727075
BAIAP2L2	0.000730893
SNRPG	0.000731617
TBPL1	0.000733116
B4GALT4	0.000734669
ENO3	0.000734892
SNRPF	0.000736752
TAF3	0.000737989
CKAP5	0.000738623
PCYT2	0.000739905
EIF3G	0.000742424
MEP1A	0.000745478
CDK2	0.000748123
CIRBP	0.000748493
KPNA4	0.000750783
RMND5A	0.000752749
PTPN23	0.000753039
CSAG1	0.000754132
PABPC1L	0.000756296
USF2	0.000758592
OR11H4	0.000759009
GAS1	0.00076018
PCNT	0.000761208
RAF1	0.00076352
NEURL4	0.000764583
MRPL21	0.000764634
SLC13A5	0.000765161
TMEM233	0.000765965
CLPB	0.000766089
NFKBIE	0.000766805
MRPL18	0.000767899
NANOG	0.000768637
ZMYM4	0.000769408
RSRC1	0.000769745
EIF3I	0.000772192
SPPL2B	0.000772493
STX8	0.000774229
TFAP4	0.000776999
DTX1	0.000777206
PSTK	0.000781192
SIDT2	0.000783435
TRMT10C	0.000783971
DIP2A	0.000784079
MAGEC2	0.000784256
TMEM70	0.000784604
ZNF561	0.000784727
FLI1	0.000785347
GNL3L	0.000786606
ARHGAP19.SLIT1	0.000786756
SLC28A1	0.000787972
RRP7A	0.000790089
MKL2	0.0007905
RELB	0.00079301
WBP11	0.000795025
NRP1	0.000800853
FAM50A	0.00080115
IFNA4	0.000802184
TPD52	0.00080399
NOS2	0.000804047
IRF2BP2	0.000804482
WDR70	0.000804597
POU5F2	0.000804598
GEMIN6	0.000804854
RPRD1B	0.000805744
CENPB	0.000809269
TMC3	0.000810138
PTPRO	0.000810182
NAA35	0.000811967
EXOSC1	0.00081422
DOK4	0.000819446
HIST1H2BO	0.000820069
UTP3	0.000823134
HDX	0.000823528
WDR1	0.000824595
SIDT1	0.000824617
MTIF2	0.000824764
PKIG	0.000825705
CSTL1	0.000827599
IL25	0.00082951
LIN7A	0.000830277
GPD2	0.000830998
IL33	0.000831893
TMEM5	0.000832021
PRKAR1A	0.0008334
TACR1	0.000835707
GRIK2	0.000838028
NDUFB1	0.000839606
RPS8	0.000839886
OBSCN	0.000840212
FAM26E	0.000841577
LRRC8D	0.000841755
IFITM1	0.000841904
BAP1	0.000842281
FRMD1	0.000842799
BYSL	0.00084302
CATSPERG	0.000843455
TRIM45	0.00084643
RAB11A	0.000849507
MDH2	0.000851374
RABL6	0.000853004
MTRF1L	0.000853315
CHI3L2	0.0008539
RBM17	0.000854274
CUL4A	0.00085515
TUBG2	0.000856698
ACOT11	0.000857577
MAGEE2	0.000858368
NCAPG2	0.000860952
ZNF444	0.000863965
ANAPC5	0.000864089
RPL23	0.000864165
SRMS	0.000864384
OR1C1	0.000864858
DNAJC19	0.000866142
TNFRSF1B	0.00086837
CXCL17	0.000868642
ZSCAN26	0.000870129
SLC2A11	0.000870301
UBE2I	0.000871407
C14orf37	0.000874222
AGL	0.000874744
PLXNB2	0.000876225
ZNF550	0.000877746
ZDHHC21	0.000878377
ARFIP2	0.000878447
SDR16C6P	0.000882356
TLR10	0.00088443
RGS8	0.000887049
PLCL2	0.000891208
CELSR1	0.000891823
WAC	0.000894901
ZFHX3	0.000895386
NDUFS2	0.00089568
MED24	0.000896725
FUT9	0.000898008
ANGEL2	0.000898807
RBBP6	0.000899144
ARHGAP36	0.000900385
SPATA32	0.000902615
ANKRD66	0.000903579
NOL6	0.000904414
MOGAT2	0.00090504
SHB	0.000906822
AQR	0.000910366
CCL20	0.000912853
HSP90B1	0.000913195
RANBP2	0.000913974
MRS2	0.000915383
ZFX	0.000915965
CLPTM1L	0.000916977
CSNK1D	0.000917678
PPP2R1B	0.000921394
GZMM	0.000922354
SRP54	0.000922568
MITF	0.000923307
DMBT1	0.000923865
ARHGAP42	0.000925094
CNOT1	0.000926405
EIF4G1	0.000930401
HMGB3P1	0.000932141
ANAPC15	0.000934215
SEC22A	0.000937685
DCTN3	0.00093798
NUS1	0.00093841
CDH16	0.000940523
CD40LG	0.000946066
KDSR	0.000946137
NRAS	0.000946259
PSAP	0.000946296
NSA2	0.000947537
VPS35	0.000950486
RELN	0.000952797
ZNF839	0.000953311
RRN3P1	0.000958619
PDE7B	0.000961021
WDR74	0.000961243
COPS3	0.000961633
ARC	0.000962312
PUF60	0.000964336
PDCD11	0.000965458
NARS2	0.000965558
RAB2B	0.000967013
GHRL	0.000968371
GOPC	0.000968705
GNB2	0.000969331
POLR2J2	0.000970261
SETD5	0.000971094
CCAR1	0.000972834
ZIC3	0.000973156
PTX3	0.000974416
ZNF345	0.000975579
PTGES2	0.000984602
FAM129C	0.000985561
CDK7	0.000985749
MCRS1	0.000990012
FDX1	0.000990327
PPP1R3B	0.000990453
SPOUT1	0.000990785
ELL	0.000991791
MED28	0.000991913
YAE1D1	0.000994629
MOSPD1	0.000994637
MECR	0.000996777
FBXO17	0.000998064
PAQR5	0.000999931
ILF3	0.00100002
CA8	0.00100158
HPGD	0.00100252
HECW2	0.00100286
CDON	0.00100485
RUVBL2	0.00100564
CBWD1	0.00100647
SSH3	0.00100725
LGALS16	0.00100851
ZNF880	0.0010088
UBC	0.00100893
VARS	0.00100926
CAPRIN1	0.00100939
ANP32E	0.00101027
SMARCA5	0.00101077
MRS2P2	0.00101101
PIPOX	0.00101111
POLE2	0.00101364
RRP12	0.0010138
MAGED2	0.00101492
KCNJ18	0.00101537
CAV3	0.00101546
MED26	0.00101873
ACTB	0.00102081
HOXD9	0.00102095
GPATCH1	0.00102217
PRKAA2	0.00102415
ALDH1A3	0.00102467
SLC4A7	0.00102705
DUSP4	0.00102807
KRTAP13.4	0.00103016
C12orf45	0.00103069
CDKAL1	0.00103498
MEIS1	0.00103604
PCNX2	0.00103883
COX15	0.00104026
RSL24D1	0.00104086
MAD2L1	0.00104107
SUMO1	0.00104256
CAPRIN2	0.00104335
WDR43	0.00104424
TUBBP5	0.0010451
MARK2	0.00104768
BRD4	0.00104829
RPS10.NUDT3	0.00105243
TUBA1C	0.00105307
PAXIP1	0.00105725
POLR2I	0.00105995
PPP1CC	0.00106201
SERPINF1	0.00106523
C1orf131	0.00106593
CD2	0.00106834
LRRC39	0.00106859
KIF21A	0.00106887
CDADC1	0.00107096
MAGEH1	0.00107123
NPR2	0.00107147
WASHC5	0.00107194
PDPK1	0.0010721
PTCHD1	0.00107475
PANK3	0.00107945
RPS7	0.00108012
PARG	0.00108188
NFATC3	0.00108242
ZNF214	0.00108364
ISM2	0.00108489
SP100	0.00108544
IL23A	0.00108558
IL17C	0.00108579
NFE2L2	0.00108898
FXN	0.00108928
EIF3J	0.00108942
TOM1	0.00109018
GGA1	0.00109027
DCAF8L1	0.00109086
IFNA7	0.0010911
TRIM66	0.00109155
ELP2	0.00109321
RPAP1	0.00109492
MIF	0.00109683
ZNF528	0.00109877
RPS6KA5	0.00109998
WFIKKN2	0.00110344
POLR1A	0.00110349
UAP1L1	0.00110768
ATP6V1B2	0.00111334
EEF2KMT	0.00111744
TRPV6	0.00112107
CLK3	0.00112129
EIF5A	0.00112186
PDS5B	0.00112276
PSMB5	0.00112591
EIF4E3	0.00112676
ULK2	0.00112687
ZIM3	0.00112717
SLC25A15	0.0011274
OR2T4	0.00112756
DHX38	0.0011278
CCSAP	0.0011299
SRCAP	0.00113089
DHPS	0.0011314
RNF180	0.00113202
INPP5E	0.00113216
LCA5	0.00113401
INO80	0.00113413
DBF4	0.00113433
MAL	0.00113576
PCNA	0.00113734
CC2D1A	0.00113981
TARS	0.00114262
TPI1	0.00114503
RLIM	0.0011456
NLGN4X	0.00114566
AQP1	0.00114763
MFHAS1	0.00115148
MAP3K7	0.0011523
COL4A5	0.00115246
ADPRM	0.0011552
KCNK2	0.0011565
COX5B	0.00115847
ADPGK	0.00115909
RPS25	0.00115992
HLF	0.00116381
ZNF207	0.00116465
ASB12	0.00116495
CSPG5	0.00116678
ZNF84	0.00117354
SNRPB	0.00117415
TMEM56.RWDD3	0.0011762
UBE2J2	0.00117631
GOLGA6B	0.00118211
NUP85	0.00118218
TFDP1	0.00118311
DDB1	0.00118562
CENPE	0.00118617
PIK3C2A	0.00118648
RARRES2	0.00118656
NAT10	0.0011872
NKX2.8	0.00118747
ZNF501	0.00118848
NLRP14	0.00119061
BTD	0.00119132
GPC3	0.00119242
REG3G	0.00119263
RAP1GAP2	0.0011943
CD151	0.00119444
CCL4L2	0.00119585
ID3	0.00119889
SDHB	0.00119932
C1QTNF6	0.00120327
HIPK1	0.0012062
SNRPA1	0.00120646
DCPS	0.001207
OR1A1	0.0012098
AMIGO2	0.00121347
ZNHIT1	0.00121504
TRIM49C	0.00121513
CCDC154	0.00121762
IK	0.00122074
NPPA	0.0012213
TRIM11	0.00122537
RAB20	0.00122689
WDR46	0.00122748
INTS10	0.00122756
ZNF735	0.00123317
MOBP	0.00123489
SLC7A7	0.00123642
PPCDC	0.00123716
KCNAB3	0.00124213
PTPN1	0.00124392
EXOSC10	0.00124587
HIST1H1B	0.00124591
NME9	0.00124672
RNF135	0.00124948
TSKU	0.00125123
ZNF132	0.00125145
MESD	0.00125258
USP17L3	0.00125595
TM4SF1	0.00125605
SORBS1	0.00126156
NCAPD3	0.00126242
NUDT15	0.00126381
SVOP	0.00126448
PTPN3	0.00126656
TOMM40	0.00126672
H2AFV	0.00126934
CANX	0.00127023
KDM6B	0.00127292
KMT5C	0.00127369
MFGE8	0.00127568
SLC22A20	0.00127705
ZCCHC24	0.00127919
SMPDL3B	0.0012797
CXCL16	0.00128001
C8orf48	0.00128232
SPINK2	0.00128419
FBXW4	0.00128523
POU3F2	0.0012869
OR2L2	0.00128811
CENPC	0.00128888
ZNF671	0.00128987
SIX4	0.00129071
LCOR	0.0012908
ZSCAN29	0.00129102
SMURF1	0.00129332
DDI2	0.00129395
RGS18	0.00129485
CYFIP1	0.00129558
RPL22	0.00129963
CUL3	0.0013038
SMC4	0.00130626
OTUD7A	0.00130641
CNGB1	0.00130755
SCCPDH	0.00131411
CRYZL1	0.00131494
ISX	0.00131556
FPGT.TNNI3K	0.00131731
PRPF18	0.00131863
PRR15L	0.00132074
ERBB4	0.00132132
SLC35F5	0.00132297
BRD2	0.00132324
ACTRT2	0.00132369
DPY19L3	0.00132699
STX5	0.00133141
TP53I13	0.0013338
CPNE2	0.00133404
DGCR8	0.00133701
PAFAH1B1	0.00133794
HRAS	0.00134174
DEFA5	0.00134317
ELP5	0.00134328
FOXF1	0.00134352
SAP30	0.00134353
VWA1	0.00134482
PSMA3	0.00134769
S100A1	0.00134942
WDFY3	0.00134989
TSHZ3	0.00135001
MYL12A	0.00135222
CD38	0.00135334
KITLG	0.00135359
POTEE	0.00135422
GNG5	0.00135508
S100Z	0.00135695
C11orf24	0.00135867
COPS5	0.00135943
FUT1	0.00136015
C3AR1	0.00136047
ADRA2C	0.00136267
ZSWIM8	0.00136318
ADAR	0.00136685
LUC7L2	0.00136703
CGN	0.00136758
UBA2	0.00136782
USP8	0.00137033
TIMM50	0.00137058
PAK1IP1	0.00137404
ACPP	0.00137707
MAP4K3	0.00137937
TRAF5	0.0013803
TCF7L2	0.00138106
HIF1AN	0.0013838
KIDINS220	0.00138523
APOA2	0.00138787
UPF3A	0.00138915
RPL27	0.00139011
TRIM49D1	0.00139084
CORO1B	0.00139283
ESRRA	0.00139295
ZMAT3	0.00139304
TRPC4	0.0013935
TP53	0.00139376
EGFR	0.00139401
SLC25A20	0.0013986
VGLL4	0.00139909
CFAP206	0.00139911
SFMBT1	0.00140038
ETF1	0.00140197
WRNIP1	0.00140477
USP7	0.00141218
DYNC1I2	0.00141612
PLRG1	0.00141703
FBXL12	0.00141963
RNF151	0.00142348
TEAD3	0.00142349
INHA	0.00142583
LMLN	0.00143021
PAK5	0.00143166
ARL5C	0.00143447
DDX55	0.00143549
DHX16	0.00143622
RAPGEF5	0.00143761
DBET	0.00143919
ACTR5	0.00144486
RDH5	0.0014452
DNAJB5	0.00144603
EIF2S2	0.00144739
USH2A	0.00144998
CXCL9	0.00145066
PKHD1	0.00145186
ARPC2	0.0014525
SH3BGR	0.00145443
CABP7	0.00145496
DNAJB2	0.00145512
MED30	0.00145696
PARD3B	0.00145888
GUK1	0.0014593
SLC41A3	0.0014602
RAB5A	0.00146251
RPTOR	0.00146432
TXLNGY	0.00146518
DISP1	0.0014685
LHX5	0.00147059
SKIV2L2	0.00147097
PYGO1	0.00147108
FUBP3	0.00147243
WT1	0.00147465
SLC22A18AS	0.00147501
POLG	0.00147521
ENAH	0.00147528
SERPINA5	0.0014767
SCGN	0.00147873
COPG1	0.00147882
RXRG	0.00147978
SNCB	0.00148042
CCDC93	0.00148615
ZNF530	0.0014903
GBF1	0.00149379
SARNP	0.00149415
PSMC3	0.00149498
FKBP2	0.00149533
IL27RA	0.00149585
DDR1	0.00149732
DLEU7	0.00149883
SERPINA13P	0.00149993
NBEAL1	0.00150211
FBXO5	0.00150424
MYL10	0.00150605
PSIP1	0.00150979
EGR2	0.00151239
STK17A	0.00151814
GSPT1	0.00152113
TPST1	0.00152565
HPX	0.00152728
OXSM	0.00152777
LRRC26	0.00153089
PJA2	0.00153167
SLC7A2	0.00153183
RGS17	0.00153854
HTD2	0.00153897
C14orf119	0.00154034
PRPS2	0.00154373
MRPL15	0.00154642
RAPH1	0.0015465
TFEB	0.00154991
ACLY	0.00155127
PANX2	0.00155152
UBN1	0.00155271
SOX6	0.00155278
UGT1A3	0.00155306
UFD1	0.00155517
CPPED1	0.00155698
TNPO1	0.00155804
HIST1H3H	0.00155821
DDX49	0.00155905
RPL21P44	0.00156046
CDC42EP2	0.00156303
RAB11FIP5	0.0015709
CAVIN2	0.00157233
GRK3	0.00157328
NDUFV2	0.00157604
GRAPL	0.00157788
TAS2R45	0.00157886
PHF5A	0.0015847
OTULIN	0.00158808
ATAD3A	0.00158894
STK40	0.00159234
GTF2IRD2B	0.00159258
CRYL1	0.0015927
CPSF3	0.00159413
SKAP2	0.00159461
NECAP1	0.00159478
RAD17	0.00159567
AEBP2	0.00159733
BGN	0.00159844
MUC13	0.00159879
HNRNPA1P10	0.00160013
CIT	0.00160241
YEATS2	0.00160274
SLC4A9	0.00160291
ETFA	0.00160789
AARS2	0.00160808
TERF2	0.00160844
X1.Sep	0.00160946
SPATA21	0.00161046
FAM210B	0.00161538
MIA	0.00161765
PHLPP1	0.00161821
MPHOSPH9	0.0016184
REV3L	0.00162312
HNRNPK	0.00162479
ABCB11	0.00164245
RPN2	0.00164475
OR6A2	0.00164568
FAM174B	0.00164664
FAM74A6	0.00164869
GOT2	0.00164877
MBD2	0.00164942
ADGRL4	0.00165008
MOB3A	0.00165147
RDH8	0.00165148
CCDC151	0.00165285
SERPINH1	0.00165324
SFSWAP	0.00165601
TMED10P1	0.00166055
SYT1	0.00166229
ELAVL1	0.00166309
HOXB13	0.00166365
PNPLA3	0.00166469
C16orf89	0.00166582
FAM200A	0.00166966
NFRKB	0.00167139
PSMD3	0.00167199
MAT1A	0.0016737
MRPS15	0.00167386
USP48	0.00168017
RAB19	0.00168234
STX18	0.00168294
RRM2	0.00168303
ZNF594	0.00168536
RNF113A	0.00168567
ACTG1	0.00168591
VARS2	0.00168692
GRWD1	0.00168815
RAPGEF1	0.00169173
SLC26A6	0.00169328
GPR162	0.00169422
ISG20	0.00170281
RAC1	0.00170498
SLC12A4	0.00170702
LARP1	0.00170764
NOTCH3	0.00170832
RBM39	0.00171075
CARS2	0.00171128
GGT3P	0.00171306
ZWINT	0.0017138
LRR1	0.00171457
RPL38	0.00171874
RNPC3	0.0017195
FOXJ2	0.00172239
ATXN3	0.00172269
CLDN5	0.00172271
NDUFB7	0.00172595
DDIT3	0.00172847
MAP1LC3A	0.00173117
ADAM2	0.00173252
PPRC1	0.00173389
NAA15	0.001735
TSG101	0.00174114
EPAS1	0.00174124
ARVCF	0.00174166
B2M	0.0017425
HEATR1	0.00174268
C6orf136	0.00174494
PDE12	0.00174501
COL8A2	0.00174511
RNF20	0.00175193
GPR153	0.00175239
BPTF	0.00175261
MYRIP	0.00175302
LAX1	0.00176075
TTC37	0.00176162
CTCFL	0.00176177
DDX41	0.0017637
CCNB1	0.00176748
WIPF2	0.00177123
CYP2D7	0.00177199
IRX5	0.00177225
PGK1	0.00177361
NIPSNAP2	0.00177677
MAP3K19	0.00177699
RPS24	0.00178076
PI4KAP1	0.00178394
HIST2H2BA	0.00178561
ANKRD17	0.00178803
ZNF200	0.001792
GNAS	0.00179214
HIST1H2AD	0.00179532
SNN	0.00179621
GLYATL3	0.0018022
TIAL1	0.00180221
JAZF1	0.00180516
DHRS13	0.00180835
CCT4	0.00180891
PRSS23	0.00180963
MAS1L	0.00181597
POLR2L	0.00181671
DNTTIP1	0.00181983
TOMM22	0.00182581
CHD3	0.00182824
ADK	0.00182975
CAPN8	0.00183134
GNA12	0.00183449
WDR92	0.0018349
SBK3	0.00183664
MVB12A	0.00183782
SH2D6	0.00183993
CRYBA4	0.00184249
X7.Sep	0.00184637
ESPL1	0.00184707
MAEA	0.00184915
MKLN1	0.00185536
EIF2AK1	0.00185844
FOXA3	0.00186061
DEGS2	0.00186329
CASP8AP2	0.00186564
STAMBP	0.00186817
TRIM28	0.00186904
BCAR1	0.00186939
C14orf2	0.00187502
ATOH1	0.00188006
DOPEY2	0.00188217
MRPL34	0.00188248
OR10H1	0.0018836
COG5	0.00188565
MRPS18B	0.0018869
ASTN2	0.00188838
CDC45	0.00188932
HDGFL3	0.00189227
IGSF21	0.00189312
RHPN2	0.00189656
SRP72	0.00189817
ZNF514	0.00189994
SPART	0.00190072
ARMC1	0.00190096
NCL	0.00190342
SSB	0.00190405
BRCA2	0.00190859
TAS1R1	0.00190997
ZNF525	0.00191398
OR5H6	0.00191528
MYH8	0.00192194
LONP1	0.00192333
POLA1	0.00192521
DLST	0.001926
RPL14	0.00192639
CFHR2	0.00192989
ASTL	0.00193051
LYG2	0.00193176
OXA1L	0.0019336
HS2ST1	0.00193826
AQP3	0.00194132
DRAM1	0.00194295
COL6A3	0.00194322
BDH2	0.00194366
VPS4B	0.0019461
CDK10	0.00194764
ORC6	0.00194863
CSMD1	0.00195348
NARFL	0.00195438
DIMT1	0.00195446
SERPINC1	0.00195455
OR5M10	0.00195927
TAPBPL	0.00195971
PPP3CC	0.00196814
LSM2	0.00197094
ZNF480	0.00197321
PAGE1	0.00197425
DAND5	0.00197748
ATG13	0.00197787
CDK5RAP1	0.00197899
MCTS1	0.00198166
CDC42	0.00198212
MPP3	0.00198281
NID2	0.00199107
GTF3C2	0.00199183
CRYGA	0.00199209
UBTF	0.00199496
LEPROTL1	0.00199528
MAP3K12	0.00200186
NBR1	0.00200194
C15orf38.AP3S2	0.00200256
PHB2	0.00200294
UTP14A	0.00200304
NDUFA3	0.00200374
RRM1	0.00200598
PRPF6	0.00200657
SLC43A1	0.0020081
ACTG1P20	0.00200813
SERPINA9	0.00200825
PTPRZ1	0.00200943
HEY2	0.00200974
SELENOK	0.00201237
YPEL5	0.00201268
PGA4	0.0020178
ZNF124	0.00202171
PGR	0.00202243
MGMT	0.00202422
CFHR3	0.0020268
AATK	0.00203151
HDC	0.00203353
BUD13	0.00203457
MEX3C	0.00203552
SGCZ	0.002036
SPHK1	0.00203697
DSCAML1	0.00203886
KRR1	0.00204053
NELFA	0.00204063
AGFG1	0.00204935
NDUFB10	0.00205266
SYCP1	0.0020566
DHX37	0.00206038
PDE4C	0.00206676
NR3C2	0.00206739
FGD1	0.00206924
TAP2	0.00206958
DHRS11	0.00206981
AKR1C8P	0.00207173
CAGE1	0.00207372
SON	0.00207567
MYL4	0.00207753
FBXL19	0.00207813
SIGIRR	0.00208087
THUMPD1	0.00208197
SCARF2	0.00208225
PITRM1	0.00208383
SOWAHB	0.00208413
ACSL3	0.00208496
INTS12	0.00208721
GRB2	0.00208821
BTBD6	0.00208926
EPRS	0.00209301
AMD1	0.00209431
NKAP	0.00209436
PREB	0.00209603
USP38	0.0020984
GUCY2D	0.00210012
ARPC4	0.00210638
GPN2	0.00210935
RARS2	0.00210938
RAPGEF6	0.00211368
S100G	0.00211533
RS1	0.00211663
SEC61B	0.00211668
UNC45B	0.00211872
TAS2R9	0.00212063
KLF17	0.00212466
FSTL5	0.00212568
GTF2E2	0.00212641
GNLY	0.00212716
SMCO4	0.00212859
RENBP	0.00212916
SRP14	0.00213167
KIAA0825	0.00213371
ZMAT5	0.00214059
GPAM	0.0021427
ACTR6	0.00214442
AADAC	0.00214456
EXOSC5	0.00214598
DDX23	0.00214626
BMT2	0.00214791
DDOST	0.00215503
ZNF439	0.00216052
KIRREL2	0.00216461
BRSK2	0.00216583
IGF2BP2	0.00216614
ENC1	0.00216721
ANKH	0.00216819
GIPC1	0.00216822
IFNA13	0.00217526
IGF1	0.00217825
C1GALT1C1	0.00218061
TMEM38B	0.0021826
ATCAY	0.0021831
PNISR	0.00218483
GPR84	0.00218969
LMBR1L	0.00219059
STIM1	0.00219373
CLEC2D	0.00219568
TMEM87B	0.00219831
ZFYVE16	0.00220142
RBFOX1	0.00220231
TALDO1	0.00220325
CXXC1	0.00220335
KAT5	0.00220339
ZNF141	0.00220484
DUSP15	0.00220568
USP25	0.00220603
SFRP1	0.00220657
LARP1B	0.00221665
SETBP1	0.0022193
IL18RAP	0.00222015
DAD1	0.00222271
DDX18	0.00222543
NRF1	0.00222564
PRDX1	0.00222576
TTC5	0.00222695
IARS	0.00222847
FOXP2	0.00223013
ILF2	0.00223096
RPF2	0.0022311
ZNF555	0.00223189
HOMEZ	0.00223794
THAP2	0.00223967
PI3	0.00223987
HERC2	0.0022401
DIABLO	0.00224194
CAPN12	0.00224349
PDAP1	0.00224433
RPLP0	0.00224684
RBAK	0.00225057
CDK8	0.00225084
TOMM6	0.00225773
NXF1	0.00225855
PLAGL1	0.00226187
LINC01879	0.00226365
WNT10A	0.00226476
IDI1	0.00226672
TTK	0.00226728
HTT	0.00226737
TBC1D10B	0.0022743
UBQLNL	0.00227431
SLC17A2	0.00227701
GNPDA2	0.00227722
FAM3B	0.00228018
OR2G3	0.00228115
IP6K1	0.00228615
ZNF350	0.00229127
SIN3A	0.00229197
CYCS	0.00229317
STARD3	0.00229458
LY96	0.0022978
DEFA6	0.00229805
ANKRD27	0.0023002
EXOSC8	0.00230357
HEATR9	0.00231419
CCKBR	0.0023158
TRAF4	0.00232124
NACAD	0.00232338
SPG11	0.00232371
GCNT2	0.00232516
ATP5L	0.00232926
UPK3BL2	0.00233337
MRPS5	0.0023338
LINC01341	0.00233614
SLC25A16	0.00233814
SDHC	0.00233907
KPNB1	0.00233971
FPGS	0.00234209
PPP1R10	0.00234213
ST6GALNAC3	0.00234254
EPS15L1	0.00234437
CENPA	0.00234702
TNS3	0.00234772
LSM7	0.00234812
SUZ12P1	0.00234827
ENPEP	0.00235425
ZCCHC7	0.00235682
SLC25A13	0.00235823
SCLT1	0.00235852
ACY1	0.00235954
CYB561	0.00236247
RGS20	0.00236463
SRF	0.0023654
ATR	0.00237457
DENR	0.00237927
S100A4	0.00238088
FIBCD1	0.00238193
WEE2	0.0023824
CCDC92	0.00238352
GOLGA1	0.00238507
SSBP1	0.00238685
HAAO	0.00239177
DHCR7	0.00239438
GDNF	0.0023969
BTLA	0.00240447
NFYC	0.00240541
TRPM1	0.00240753
CRBN	0.00240768
SLC26A5	0.00241729
ZNF330	0.002419
RFNG	0.00242054
ZACN	0.0024214
SNRPB2	0.00242503
MED14	0.00242533
SLC7A10	0.00242546
TMX1	0.00242625
CEP57	0.00242714
UGT8	0.00243079
NUP54	0.00243693
MC1R	0.00243765
BRMS1	0.00244652
SLC26A11	0.00245418
ZNF277	0.00245421
UTP4	0.00245557
C16orf87	0.00246112
ECD	0.00246162
USP31	0.00246501
KCNQ2	0.00246621
DCXR	0.00246642
ODF2	0.00247089
RPP38	0.00247106
GNL3	0.002477
BATF3	0.00248005
NT5C3B	0.00248145
DDX27	0.00248217
ACAT2	0.00248419
FXYD3	0.00248699
CPSF2	0.00248731
CCT2	0.00249228
SOX17	0.00249244
EXOSC9	0.00249742
SORCS1	0.00249842
DGAT1	0.00249934
TFDP2	0.00250109
RAB7A	0.00250181
PRCC	0.00250308
TEX261	0.00250614
RPS29	0.00250868
TARS2	0.00251122
SCN3B	0.00251149
GNL2	0.00251176
SUSD3	0.00251302
TSPO2	0.00251324
TSPYL5	0.00251488
IL13	0.00251754
SLC17A7	0.00252003
NUBP1	0.0025213
NUPR2	0.00252412
EHMT1	0.00252421
USP19	0.00252702
SNRPD3	0.00253028
TNFSF13	0.00253163
ITGB1BP1	0.00253637
OR51B5	0.00253712
ZNF573	0.00254297
SYMPK	0.00254772
SMARCB1	0.00254818
LRRC8C	0.00254877
HSPA1B	0.00255108
PEX14	0.00255156
PEX10	0.00255156
SIAH1	0.00255762
CS	0.00255804
SLC4A4	0.00256199
UBA1	0.00256594
ERCC2	0.00256603
PIK3C3	0.00256684
RPS4X	0.00257094
NOL7	0.00257832
GRSF1	0.00257843
LINC01567	0.00257869
RPL31	0.00257956
CBFA2T2	0.00258005
SIGLEC14	0.00258039
FRG1CP	0.00258198
XPO7	0.00258221
ACTR2	0.00258576
PGAM5	0.00258603
PAX1	0.00258627
OR3A1	0.00258796
CAMK1D	0.00259481
BPIFB1	0.00259543
LINC00310	0.00259613
RERGL	0.00259745
EFNA4	0.00259923
RFX1	0.00259972
SOAT2	0.00259982
OGG1	0.00259989
PPFIA1	0.00260147
IL17B	0.00260702
NPEPPS	0.0026073
TCF23	0.00260876
PAQR6	0.00260923
ASGR2	0.0026115
KIAA0100	0.00261453
TMUB2	0.00261466
RNF17	0.00263136
SF3B6	0.00263249
NCBP2	0.0026335
P2RX1	0.00263619
BRF1	0.00263624
NUP98	0.00263675
CALCOCO2	0.00264653
KARS	0.00264711
NCOA7	0.00264863
HESX1	0.0026508
A1CF	0.00265242
EIF3M	0.0026544
NPTN	0.00265508
GIMAP1	0.00265543
NAE1	0.00265831
PLA2G5	0.00265836
TSTA3	0.00266138
SEC14L3	0.00266211
GP5	0.00266452
DDX51	0.00267025
MOCS2	0.00267636
TEAD1	0.00267739
LMO3	0.00267809
TPT1	0.00267909
MAU2	0.00268041
STARD7	0.00268085
PFAS	0.00268282
ACIN1	0.00268361
RAB27A	0.00268788
ELP4	0.00269226
NCEH1	0.00269268
RPLP2	0.00269297
HS3ST4	0.00269386
VTI1B	0.002694
PRODH2	0.00269514
CNN3	0.00269627
RELA	0.00269732
VPS51	0.00269952
TMEM65	0.00270251
RPL35	0.00270503
UNC13B	0.0027071
SLC5A7	0.00270716
LCN15	0.00270866
FLII	0.0027129
SLC36A2	0.00271352
PPFIA3	0.0027145
TRIAP1	0.00271477
PLK4	0.00271871
POLR2F	0.00271966
ZNF276	0.00272337
MDM2	0.00272769
VIL1	0.00272807
BANF1	0.00273546
SERBP1	0.00273844
RCBTB1	0.00275122
EPG5	0.00275529
ANAPC1	0.00275839
SLBP	0.00276539
SLC2A5	0.00276799
CACFD1	0.00276868
SLC39A7	0.00277294
FAM71A	0.00277463
POP5	0.00277807
HSD17B13	0.00278252
USP39	0.00278419
WFDC1	0.00278998
CLMN	0.00279642
PDLIM7	0.00279955
MRPL32	0.0028002
CDC14B	0.00280089
CLTC	0.00281332
ENPP5	0.00281405
RHBDL2	0.00281475
GLUL	0.00281578
TNFSF10	0.00281613
SCN7A	0.00281829
PDE6B	0.00282179
WWTR1	0.00282268
LRCH4	0.00282468
KCNJ5	0.00282537
PPP1CA	0.00282954
SLC30A8	0.00283103
ECT2	0.0028341
RPL9	0.00283478
GOLGA4	0.00283496
VPS13D	0.00283593
ACTR8	0.00283629
CDC16	0.00283728
ERBB2	0.00283752
DROSHA	0.00284707
SSH2	0.00284736
NAA38	0.00284908
CPZ	0.00285179
MCOLN3	0.00285562
WDR3	0.00285577
ATP6AP1L	0.00285948
VCP	0.00285995
TMEM184B	0.00287402
ASMT	0.00287567
SYNRG	0.00287574
MAPKAPK5	0.00288066
PDZD2	0.00288073
OR2J2	0.00288304
FABP12	0.00288393
NOP53	0.00288402
RAC3	0.00289023
WNT9A	0.00289081
ZSCAN31	0.00289089
PTTG1IP	0.00289108
HEPH	0.00289174
PRDM7	0.00289517
NDUFA12	0.00289604
PHF11	0.00289844
EPC2	0.00289912
TFF1	0.00289939
HELZ	0.00289951
TIMM22	0.00290017
GLYR1	0.00290571
ZNF460	0.00290935
HINT3	0.00291073
GALNT1	0.00291086
PELI3	0.00291132
ISCA1	0.00291588
UBE2V1	0.002918
PCYOX1L	0.00292221
ATP6AP2	0.00292314
EMC3	0.00292748
CHADL	0.00293178
FARSA	0.00293304
CHN1	0.00293513
HLA.DRB3	0.00294067
EPGN	0.00294163
TBC1D30	0.00294349
ZNF567	0.0029439
ZEB2	0.00294509
DOK5	0.00294726
RAB40AL	0.00295082
TTC23	0.0029515
CAMK2N1	0.00295584
DNAJA2	0.00295599
TRIM55	0.00296058
MSI2	0.00296296
HSF1	0.0029649
MRPS31P5	0.00296529
PAAF1	0.00296766
RPS27A	0.00297449
RBMXL1	0.00297647
FNDC5	0.00297991
ENTPD6	0.00298247
CYP8B1	0.00298288
FBXO11	0.00298417
NECTIN3	0.00298475
ANGPT4	0.00298529
UQCR11	0.0029875
XIRP1	0.00298954
CHD2	0.00299357
PSMB1	0.00299759
GLIPR1L1	0.00300131
SKOR1	0.00300364
CNIH1	0.00300703
ACTN1	0.00300807
PSMB8	0.00300837
PNPLA8	0.00300871
STIL	0.00301948
RPL28	0.00302665
DDX3X	0.00304187
SLC26A9	0.00304484
PLD5	0.00304488
SMU1	0.00304673
ARHGAP32	0.0030513
DLG5	0.00305186
MAP1LC3C	0.00305298
HSPA9	0.00305501
WDR33	0.00305671
FKBP1B	0.00305898
EIF2B3	0.00306027
NOP16	0.00306268
EPHB4	0.00306578
RALGPS2	0.0030713
ZNF311	0.00307146
DNM2	0.00307204
GPR157	0.00307989
FBXL21	0.0030842
MED1	0.00308473
LAMTOR2	0.00308664
CEP164	0.00309494
HDHD5	0.00309827
DIS3L	0.0031039
PPARGC1A	0.00311119
EWSR1	0.00311143
RBM28	0.00311239
TPSG1	0.00311663
SNRPD1	0.00311754
ABHD14B	0.00312333
PAICS	0.003127
RCHY1	0.0031281
NMRK1	0.00312868
CD300LB	0.00312985
[truncated: 2,382 more rows]

## Sheet: expression_results
gene_symbol	overall_p
KIRREL	5.3945e-07
ERRFI1	8.80646e-07
PLOD3	9.14707e-07
COG2	9.3559e-07
MICALL2	9.80804e-07
CYB5D2	1.621e-06
BICC1	1.98279e-06
SMIM14	2.0101e-06
LOC100506558	2.64503e-06
MATN2	2.64503e-06
ZNF518A	3.0759e-06
SLC43A2	3.14796e-06
MIR600	3.25382e-06
MIR600HG	3.25382e-06
SDC4	3.59855e-06
BTN2A2	3.85415e-06
KLF4	4.25279e-06
MSH5.SAPCD1	4.39257e-06
SAPCD1	4.39257e-06
KRCC1	4.6514e-06
GADD45B	5.34743e-06
MBD5	5.82692e-06
AHNAK	6.08671e-06
OBFC1	6.57278e-06
LOC728903	6.61859e-06
LOC102724441	6.68534e-06
LOC102724951	6.68534e-06
TST	6.84099e-06
STBD1	7.12275e-06
PARD6A	7.29259e-06
DPYSL2	7.47274e-06
SHROOM3	7.948e-06
P2RX5	8.09917e-06
FOXO1	8.18957e-06
ATP7B	8.23745e-06
PTPN13	8.68645e-06
PAX8	9.32323e-06
SASH1	1.07309e-05
WWTR1	1.07655e-05
MAPK10	1.09395e-05
KDM4C	1.27529e-05
INADL	1.31759e-05
GLIDR	1.35485e-05
ZSCAN16	1.3653e-05
SGMS2	1.50335e-05
PLS3	1.53039e-05
OCIAD2	1.55342e-05
AP1S2	1.5629e-05
RP11.10K16.1	1.63714e-05
LOC101929889	1.79887e-05
RASSF5	1.89512e-05
SDC1	1.89827e-05
TLE1	2.12785e-05
P4HTM	2.18683e-05
QSOX1	2.22152e-05
PTPRF	2.22619e-05
DOCK1	2.46591e-05
JUN	2.61799e-05
CTSS	2.74253e-05
PFKFB3	2.7567e-05
FLJ45482	2.7603e-05
RP11.498C9.15	2.87899e-05
SH3RF1	3.00667e-05
CCND1	3.09496e-05
FLNB	3.0991e-05
COL18A1	3.13767e-05
G6PD	3.20834e-05
AKAP12	3.23521e-05
ADAMTS9	3.27384e-05
PTPRK	3.31213e-05
ERBB2	3.31669e-05
TBC1D7	3.35547e-05
CCDC92	3.46568e-05
ATP6V0A1	3.48614e-05
RIN2	3.72627e-05
VAV3	3.75017e-05
HRK	3.76783e-05
PRRG1	3.79766e-05
GJC1	3.85379e-05
CASK	3.87315e-05
FOLH1B	4.04448e-05
TSPAN6	4.21111e-05
DBN1	4.2537e-05
MSX1	4.31606e-05
TPBG	4.36741e-05
PPP1R13L	4.42428e-05
NCEH1	4.45382e-05
ZFHX3	4.45705e-05
XYLB	4.4866e-05
GALM	4.52972e-05
SLC12A7	4.64996e-05
ZNF75D	4.9457e-05
ACOT1	5.00422e-05
ACOT2	5.00422e-05
LOC102725188	5.09074e-05
ANKH	5.17591e-05
TMEM45A	5.25082e-05
PKD2	5.29777e-05
CDK2	5.31779e-05
LOC100289019	5.45488e-05
SMARCA1	5.46864e-05
SUZ12P	5.80246e-05
FOLH1	5.89615e-05
TCEAL1	5.96309e-05
ZNF658	5.97649e-05
ASMTL	6.00421e-05
CNN3	6.1269e-05
MOK	6.18636e-05
CDC42EP4	6.31417e-05
RGMB	6.43827e-05
LOC101060321	6.50307e-05
LOC101060351	6.50307e-05
LOC101060376	6.50307e-05
LOC101060389	6.50307e-05
LOC102723859	6.50307e-05
LOC102724862	6.50307e-05
TBC1D3	6.50307e-05
TBC1D3C	6.50307e-05
TBC1D3F	6.50307e-05
TBC1D3H	6.50307e-05
FXYD2	6.52142e-05
THAP10	6.60384e-05
C12orf75	6.67942e-05
PFN2	6.69692e-05
RAB27A	6.77205e-05
ANKS6	6.90559e-05
MID1	6.90836e-05
PLK2	6.91686e-05
LOC101929500	6.95751e-05
MPDZ	6.99056e-05
CRIM1	7.10335e-05
RBPMS	7.25473e-05
KIF13A	7.2565e-05
SH2B3	7.38946e-05
MICALL1	7.41046e-05
ABHD2	7.46265e-05
DLG5	7.55134e-05
SRGAP1	7.58448e-05
ARSD	7.76075e-05
LOC101929728	7.78923e-05
SLC35E4	7.78923e-05
NSUN6	7.93994e-05
UPP1	8.00403e-05
RALGPS2	8.08101e-05
PEG10	8.1089e-05
ZNRF3	8.23717e-05
RIMKLB	8.23885e-05
LOC100506844	8.30458e-05
NME7	8.35034e-05
PRRT3.AS1	8.59853e-05
ST6GALNAC4	8.67735e-05
LTBP3	8.74581e-05
RRAGB	8.87152e-05
CFL2	9.05069e-05
TYRO3	9.08566e-05
C9orf116	9.12324e-05
TBC1D8B	9.24668e-05
NCS1	9.33409e-05
IRS1	9.51394e-05
KLHDC8B	9.54141e-05
CLU	9.70277e-05
RAI14	9.71036e-05
ZFP36L1	9.87828e-05
POLR2F	9.9665e-05
AJUBA	9.99088e-05
LOC646903	0.000100114
BFSP1	0.000100119
UQCRH	0.000100295
UQCRHL	0.000100295
ZBTB1	0.000100713
SYNE2	0.000100735
RP11.539L10.3	0.00010094
GAA	0.000101683
ATP8B1	0.000102148
CPED1	0.000102346
CHAMP1	0.00010289
ANKRD18A	0.000103554
IFT27	0.000103931
LOC100131262	0.000104136
PKNOX2	0.000105123
SEZ6L2	0.000105234
DGKE	0.000105564
PLEKHA1	0.000106218
RALGAPA1P	0.000106228
PTRF	0.000106819
NHSL1	0.000107076
PARD3	0.000107204
ZEB1.AS1	0.00010809
TTC7B	0.000109302
RNF144B	0.000111958
SH3YL1	0.000112305
DUSP19	0.000112634
FARP1	0.000112949
CNKSR3	0.000113076
KDELC1	0.000113082
DDR1	0.000113463
MIR4640	0.000113463
SLC16A5	0.000113547
COL4A1	0.000114835
AMACR	0.000115357
ANXA2P2	0.000115517
SCRN1	0.000117436
IL13RA1	0.000117463
MORC4	0.000117697
SEPT_6	0.000117841
C20orf196	0.000118281
MYOF	0.00011872
TAF4B	0.000118931
PCDHGA4	0.000119564
LHFP	0.000121417
GPX8	0.000121517
GSTP1	0.000122638
RP11.50B3.4	0.000122921
AMIGO2	0.000123255
MGST1	0.000123907
SPP1	0.000124083
GDPD5	0.000126599
GPR161	0.00012851
MAP2K6	0.000128642
AXL	0.000128684
RRAS2	0.000128946
GPNMB	0.000130795
ICK	0.000131281
SPA17	0.000132811
CCDC186	0.000135026
ANXA4	0.000138287
C12orf60	0.000139257
POU4F1	0.000139607
PLEC	0.000140745
SPAG1	0.000141348
TSPAN33	0.000142813
CYP1B1	0.000143555
ADAM21	0.000144473
WDR6	0.00014489
LAMC1	0.000145673
SLC7A8	0.00014728
CARD10	0.000147942
CYB561	0.000148343
LOC100133920	0.000148431
ELL3	0.000149315
ZNF503	0.000149418
CAMKMT	0.000151405
PRIM2	0.000151477
ATP8B2	0.000152332
SMAGP	0.000152539
TNFRSF12A	0.000153096
NMT2	0.000153779
UBBP2	0.000154077
FSCN1	0.000155858
LOC101928000	0.000156374
PRIM2B	0.000156457
PKP2	0.000156498
NIPAL3	0.000157257
GPX3	0.000158105
TJP1	0.000159173
RASAL2	0.000159312
SDF2L1	0.00016125
PPP2R3A	0.000161417
CREM	0.000161435
EXO1	0.000161871
ECHDC2	0.000162543
SGK223	0.000162933
CPXCR1	0.000164422
ZNF395	0.000164657
LOC728705	0.00016552
VASH2	0.000165791
ACOT7	0.000166258
MIEF2	0.0001666
TUFT1	0.000166999
KBTBD8	0.000167578
S100A10	0.000168735
PCDHGA1	0.000168985
PODXL	0.000171684
NMB	0.00017208
EGFR	0.000172158
PCDHGA9	0.000173229
PPFIBP1	0.000174134
PCDHGA2	0.000174193
PCDHGA7	0.000174193
PCDHGB1	0.000174193
PCDHGB2	0.000174193
PCDHGB3	0.000174193
PCDHGB4	0.000174193
WDFY3.AS2	0.000174515
SLC9B2	0.000174767
ASNS	0.00017484
SNX21	0.000178653
CALD1	0.000179687
ARHGEF26	0.000183696
RP11.410L14.2	0.000183702
C21orf91	0.00018436
TMEM56	0.000185836
GK	0.000186236
ZADH2	0.00018649
MSRB2	0.000186538
VCAN	0.000186698
C5orf55	0.000187492
ZNF618	0.000187524
PLS1	0.00018766
CLDN1	0.000188481
MST4	0.000189122
GLIS2	0.000189788
SLC43A1	0.000194217
TUSC3	0.000194253
PCDHGB5	0.00019542
LOC100509445	0.000196199
LOC728715	0.000196199
OVOS	0.000196199
OVOS2	0.000196199
PCDHGA11	0.000196714
ADA	0.000199755
PLGLB1	0.00020068
ZNF629	0.000201054
PLAG1	0.000201533
TCEAL3	0.000201889
RAB30	0.000203281
PRR34.AS1	0.000204569
FAM102B	0.000204806
LPCAT1	0.000205349
LAPTM4B	0.000205361
FMN1	0.000207777
EDN1	0.000207817
CCDC171	0.00020796
ACN9	0.000208637
FOXQ1	0.000209942
MYO6	0.000212234
PPP1R9A	0.000215886
DSG2	0.000216153
ATRIP	0.000216344
TREX1	0.000216344
IGF2BP2	0.000219706
PDE4B	0.000219919
TMTC3	0.000220082
TIGD6	0.00022029
FGD1	0.000220997
COL4A2	0.000221295
SMAD3	0.000222137
LOC100506076	0.000223232
LOC100506123	0.000223232
KIAA1551	0.000223378
TEX30	0.000223992
KDELR3	0.00022541
ITGB8	0.000225411
JAZF1	0.000225969
SLC9A7	0.000228653
AMOTL2	0.000230729
APOBEC3F	0.000230906
RFESD	0.000232019
FLRT2	0.000232312
LOC100506718	0.000232312
ALMS1.IT1	0.000233333
DOCK9	0.00023847
UGCG	0.000239364
TUBA1A	0.000240189
SPATA13	0.000243387
SH3D19	0.000243388
FBXO16	0.000244046
HOXD8	0.000245193
SLC2A1	0.000245679
PRKD3	0.000245869
LYSMD2	0.000246476
GEM	0.000246592
FAM223B	0.000246667
CC2D2A	0.000248492
WIPI1	0.000249288
CLCN5	0.000250994
PHF11	0.000251206
PON2	0.000251743
RNASE4	0.0002521
MIR29B2	0.000252646
MIR29C	0.000252646
RIT1	0.000254484
IGFBP6	0.000254579
ASPHD1	0.000254929
KLHL22	0.000255524
MXRA7	0.000255617
TMEM64	0.000255819
PCDHGB6	0.000257223
TOMM40L	0.000258753
PKI55	0.000259154
CD320	0.000259559
VSIG10	0.000260367
TSPAN14	0.000262317
FMNL2	0.000262764
AS3MT	0.00026318
SNCA	0.000263322
HDGFRP3	0.000264858
PLCB4	0.000265441
EPHA4	0.000265691
ENO3	0.000265701
WDR91	0.000266657
BICD1	0.000269378
CA5B	0.000269539
PIR	0.000269559
NAT1	0.000269649
UACA	0.000271407
PDP1	0.000274482
PCDHGA10	0.000275803
PCDHGC5	0.000276034
RPGR	0.000276183
LRRC1	0.00027633
DMTN	0.000277434
ZNF765	0.000277708
PCDHGA8	0.000278084
FBXL2	0.000278128
CAPG	0.000278606
BTN3A2	0.000279449
CD83	0.000279662
FAM47E.STBD1	0.000283684
EPHB2	0.000285034
SLC1A4	0.000285881
ACADSB	0.000286314
SQRDL	0.000287476
MYH10	0.000289667
PRKAA2	0.000291129
PSMD5.AS1	0.000293766
GOLGA2P5	0.000296122
LOC727820	0.000296453
DGKA	0.000297898
DUSP1	0.000298086
LOC101928274	0.000301045
ZNF397	0.000306083
PTGR1	0.000307373
PCDHGA12	0.000307614
PCDHGA5	0.000307614
PCDHGA6	0.000307614
ZSCAN31	0.000308686
C5orf63	0.000310245
PALLD	0.000310565
DYNLT3	0.000310635
HOGA1	0.000311239
CTD.2528L19.6	0.000312662
MCM5	0.000313726
CCDC15	0.000314925
MAFG	0.000315752
KLHL26	0.000316636
GDF15	0.000317196
AIM1	0.000317546
ARHGEF39	0.000323266
SFN	0.000323378
OCLN	0.000324119
HIST1H2AK	0.000325406
CDCA7	0.000326408
SLC27A1	0.000328287
ENOX1	0.000329476
HPS4	0.000329862
ENAH	0.000329866
ANTXR1	0.000330005
IRF1	0.000330204
ARHGEF10	0.000330904
TBC1D9	0.000333713
EPS8	0.000333894
PAWR	0.000334376
SLC22A3	0.000334671
RHOC	0.000334731
AVPI1	0.0003348
C17orf97	0.000336132
IRAK1BP1	0.000336461
DIP2C	0.000341163
PTPN14	0.000341827
EFCAB2	0.000347683
GLIPR1	0.000349065
SMURF2	0.000350345
ZNF569	0.000351858
EFNA5	0.000352019
BCL6	0.000354878
LOC374443	0.000355064
ZFAND4	0.000355243
ZNF304	0.000356679
SAT2	0.000357386
SLC25A46	0.000357503
LRRC8E	0.000357888
MEIS1	0.000359267
COL1A1	0.000361134
SEMA3F	0.000362103
ZNRF1	0.000362364
LOC100129406	0.000362503
PLEKHA5	0.000362716
LINC00883	0.000364256
PTP4A3	0.000366826
UGGT2	0.000367196
MACROD1	0.000369369
ZXDA	0.000374299
RALGAPA2	0.000374615
NT5DC3	0.000375774
PARVB	0.000376141
RGS3	0.000376541
BAG2	0.000377796
RHBDF1	0.000379607
NFIB	0.000382205
DSP	0.000382628
NPEPL1	0.0003864
WDR59	0.000386594
CAV1	0.000386639
PCDHGA3	0.000387635
TMPRSS15	0.000387986
NFATC1	0.000388653
C1QTNF3.AMACR	0.000389984
CD24	0.00039043
SPSB1	0.000390788
FAH	0.000391117
DZIP3	0.000396026
SCARF1	0.000397488
GABARAPL3	0.000401448
CELSR2	0.000402012
GJA3	0.000403282
KRT7	0.000403539
PCDHGB7	0.000403552
B4GALT6	0.00040618
TMEM136	0.000407919
ZNF302	0.000409956
CCDC30	0.000410935
FAM127A	0.000411
AK055981	0.000414007
ADM	0.000415441
HCFC1R1	0.000416641
ATP11A	0.000419172
SERPINH1	0.000421232
TSPAN5	0.000421839
TMEM17	0.000422764
KIAA1958	0.000424668
PCNXL2	0.000426557
OSMR	0.000427926
LIMA1	0.000428073
PTPN6	0.000429028
SIAE	0.00042995
FBXO6	0.000432139
FNBP1L	0.000432398
ADCK3	0.000433867
ZNF770	0.000434309
LOC100505549	0.00043483
NFKBIZ	0.000439513
TRPS1	0.000440192
SOD2	0.00044044
CDC25A	0.000440476
SULT1A2	0.000443795
LIF	0.000445561
CTSK	0.000446112
EFNB2	0.000449664
MDFIC	0.000450969
BAMBI	0.000451122
GABPB1.AS1	0.000451886
S100A16	0.000454963
OGFRL1	0.000457871
TP53	0.000459064
PHACTR2	0.000459318
SLC26A11	0.00045951
ALDH7A1	0.000459643
HLTF	0.000460942
RP4.781L3.1	0.000463866
BACE1	0.000465341
LOC100996761	0.000465698
LOC101929792	0.000465698
LOC101930416	0.000465698
RP11.4O1.2	0.000466474
CAV2	0.000467017
IL27RA	0.000467188
MYLK	0.000473798
DDAH1	0.000474158
PCDHGC4	0.000475327
PCDHGC3	0.00047638
AARS2	0.000477332
F2RL1	0.000478999
SLC35F2	0.000479518
IDI2.AS1	0.000480951
ZDHHC11B	0.000482138
MAD1L1	0.000482232
TRIM36	0.000486329
DNAJC22	0.000487258
GABARAPL1	0.000489161
LOC100132057	0.000490462
FAT1	0.000492483
SIX4	0.000493328
SGTB	0.000495634
MAFF	0.000496998
SLC4A11	0.000498801
PGM1	0.000500279
TANC2	0.000501524
PNMA1	0.000503419
PDE4DIP	0.000503798
CEBPD	0.000503865
HIPK2	0.000504286
NGFRAP1	0.000504377
PLGLB2	0.000505074
MTUS1	0.000510582
FAM107B	0.000512656
SLFN5	0.000513862
RP11.216L13.19	0.000514694
ZCCHC11	0.000514868
PHLPP1	0.000516143
THNSL2	0.00051651
SRGAP2	0.000516631
KLHL9	0.000517583
RAB40B	0.000519594
CRYL1	0.000522828
B3GNT5	0.000525289
SEMA4C	0.000530357
FAXDC2	0.000532286
ABCA5	0.000534327
FRMD6	0.000534957
BLVRA	0.000537205
OSER1.AS1	0.00053794
GAS2L3	0.000539038
GOLM1	0.000540182
PLEKHG2	0.000545058
SLC41A2	0.00054705
TTC7A	0.000547538
UBASH3B	0.000548196
THBS1	0.000549741
LIMK2	0.000549936
RGS14	0.000553479
ANG	0.000556175
RGS5	0.000560235
AK4	0.000561078
LOC100507855	0.000561078
ARRDC4	0.000563216
PBK	0.000564931
LOC158402	0.00056506
PM20D2	0.000565632
KRT8	0.000568645
THEMIS2	0.000570167
ZNF615	0.000570951
PROSER2	0.000573696
ACAT1	0.000574849
PER2	0.000575865
BC017398	0.000578245
CTD.2314B22.3	0.000578245
DQ786293	0.000578245
LL22NC03.N64E9.1	0.000578245
ZCCHC24	0.000578594
TSPAN12	0.000580368
IFITM2	0.000580386
FANCM	0.000580607
CLEC2D	0.000581615
THNSL1	0.000582041
SLC2A13	0.000583346
TTYH3	0.000585806
CTTNBP2NL	0.000586042
ST5	0.000586403
BNIP3	0.000587667
TMEM54	0.000589287
HIST1H3E	0.000589461
ODF2L	0.000589665
X10.Sep	0.000589969
SYNE3	0.000595436
PLXNB2	0.00059624
LRP11	0.000598495
DTX4	0.000598918
STYK1	0.000605165
C3orf14	0.000605196
ADAT2	0.000606447
AIF1L	0.000607429
FLJ23867	0.000608395
ST6GAL1	0.000615617
CHCHD10	0.00061647
SLC37A3	0.0006177
LURAP1L	0.000618692
CSRP2	0.000619477
IL15	0.000622231
NME4	0.000622288
RPH3AL	0.00062235
PFKFB2	0.00062237
WFS1	0.000623593
PTK2	0.000623725
SCCPDH	0.000627238
MXD1	0.000627783
IER3	0.000628601
PPARGC1B	0.000628931
CPS1	0.000629988
PPAPDC1B	0.000630273
PLOD2	0.000630895
SLC16A7	0.000631207
KIAA1841	0.000631383
MAGI1	0.000636002
RAD51.AS1	0.000636911
CHFR	0.000639005
TMEM55A	0.000639651
CNTNAP3	0.000639668
LGALSL	0.000640038
GPRC5C	0.00064063
FSBP	0.000643299
ASAH2B	0.000643787
ST3GAL5	0.000644616
VGF	0.000644656
DSERG1	0.000644658
C7orf31	0.000646027
DOCK4	0.000646155
WASF3	0.000646519
CNTNAP3B	0.000649321
LEPREL4	0.000649704
TNFRSF14	0.000649731
SGCB	0.000649739
TRERF1	0.000651543
STRBP	0.000652163
SMA4	0.000655386
ATP9A	0.000655426
EML5	0.000655535
LINC01355	0.000655706
AK025288	0.000659578
ITGA6	0.00066028
LRRC16A	0.000660966
HEY1	0.000662573
CDC42BPB	0.000663902
THSD4	0.000663958
KLHDC7B	0.000664772
TRIM52.AS1	0.000665834
CRNDE	0.000665908
REPS2	0.00066771
GCLC	0.000668703
LL22NC03.N14H11.1	0.000668903
CYTH3	0.000671289
EEA1	0.000674651
FAM229B	0.000674773
ZNF680	0.00067662
IGSF10	0.000678481
GLB1L	0.000679504
RP13.39P12.3	0.000679598
ZNF729	0.000682064
LOC100506990	0.000682162
FSD1L	0.000685884
WWC2	0.000687317
PITPNM3	0.00068888
C2orf72	0.000692337
LDHB	0.000692847
NOS1AP	0.000696066
TSPAN15	0.000697135
HERC6	0.000702191
MITF	0.000702209
WLS	0.000703846
SERPINB1	0.000704854
MSN	0.000705323
ORMDL3	0.00070612
ANXA2P1	0.000708166
TNNI3K	0.000708207
CTSV	0.000712185
PCAT6	0.000715809
LINC00341	0.000716487
MMAA	0.000716541
DLG3	0.000720369
AX746823	0.000721324
PEX11A	0.000723246
LOC100996724	0.000724146
ZSCAN26	0.000724184
ALCAM	0.000724487
TUBB6	0.00072454
NIN	0.000724585
LOC102724275	0.000725109
LOC645513	0.000725471
EPB41	0.000728084
MB21D2	0.000728146
ANKEF1	0.000728894
NPDC1	0.000728966
ATXN7L1	0.000729705
RFXAP	0.000729886
SGCE	0.000731655
NMI	0.000731789
AHNAK2	0.000733758
IFITM1	0.000734501
SLC22A4	0.000735206
RP11.285F7.2	0.000735235
LDLRAD3	0.000736655
KCTD1	0.000738536
RBMS2	0.000742596
PARD6G	0.000744027
FCHO2	0.000744738
RP11.96K19.4	0.000751613
ZNF177	0.000751911
ZNF559.ZNF177	0.000751911
SOWAHC	0.000754586
DTWD1	0.000754713
PARP8	0.00075774
ZNF93	0.000759199
IQCJ.SCHIP1	0.000761059
SCHIP1	0.000761059
LAMA3	0.000763638
RAMP1	0.000766473
SGK1	0.00077109
MIR6845	0.00077355
NRBP2	0.00077355
MAML2	0.000774906
DCBLD2	0.00077748
PPAP2B	0.000778292
DDIT4	0.000783107
CDC14A	0.000786506
ZNF519	0.000795841
MCC	0.000796689
RP11.196G18.24	0.000799801
MYL4	0.000802304
TRIM73	0.000804335
C12orf5	0.000806119
ZC3H12C	0.000811669
MAP3K1	0.000812853
PDGFD	0.000813321
SLC6A8	0.000813728
OSBPL7	0.000816669
GSTA1	0.000817547
RAB32	0.000818571
CHST11	0.00082052
CALML4	0.000824678
SPATA20	0.000825021
EBP	0.000825214
KIAA0895	0.000826753
WWC3	0.000827691
ARHGAP18	0.000829599
BEX4	0.000831485
NUPR1	0.000832767
LOC100129518	0.000834423
RPL22L1	0.000836157
ATP1B1	0.000837528
DYNC2H1	0.000838094
SERPINE2	0.000838722
ELFN2	0.000840127
ZNF260	0.000841292
X2.Mar	0.000845073
C7orf63	0.000846082
CCDC88A	0.000848872
CD109	0.000849888
LRRC20	0.000850854
KIAA1671	0.000850984
PPP1R15A	0.000854467
VAV2	0.000855651
MBP	0.000858662
DAPK1	0.000859726
DYX1C1	0.000859771
TDRD3	0.000860112
ERBB3	0.000860498
FAM127B	0.000861012
EEF1A2	0.000866664
KLF13	0.000871678
ARID3A	0.000872656
SLC8A1	0.000874023
ANKS1A	0.000874686
MYBL1	0.000874763
MYOM3	0.000879247
RHOJ	0.000879833
ZC2HC1A	0.000881075
ABHD17C	0.000882105
CKAP4	0.000886019
BLM	0.000886913
LINC00674	0.000887025
MIF	0.000887413
PYGL	0.000894964
TM4SF1	0.00089503
C11orf80	0.000896374
ARRDC3	0.000896666
STARD13	0.000903718
SLC25A29	0.000904647
ALDH3A2	0.000907511
SETDB2	0.000909017
TMEM263	0.000916073
LOC102724517	0.000921732
POLR3G	0.000923306
TFCP2	0.000923513
TNFSF10	0.000923758
CAPN3	0.000924729
ARHGEF3	0.00092524
CLHC1	0.000928892
PHLDA2	0.00093176
SGSH	0.00093512
RRAS	0.000944415
COX10.AS1	0.000945001
FAM214A	0.000945499
LOC100506548	0.000945826
UBE2E2	0.000947048
YPEL3	0.000947252
SH3BGRL	0.0009527
RNF19A	0.000955211
CNTRL	0.00095804
VLDLR	0.000958228
CTGF	0.000958441
ABCA2	0.000958567
MFSD12	0.000959167
NBPF3	0.000967158
FERMT1	0.000968656
LOC389765	0.000968853
PTGER4	0.000969046
ZNRF2	0.00097295
EHD4	0.000977578
IRF7	0.000977797
AREG	0.000981653
IFI35	0.000982221
SETD9	0.000982326
EPHX1	0.000983247
EPHA2	0.000983527
LGALS3BP	0.000987449
RUNX2	0.000987519
SMAD1	0.000990666
LOC102606465	0.000992322
LOC101926967	0.000995591
PLCE1	0.000996937
ULK2	0.000998936
KIAA1804	0.000999684
LATS2	0.00100074
LOC729680	0.0010057
MLLT3	0.00101385
ZFHX4	0.00101646
FAM210B	0.00101886
SPIN4	0.00101921
FERMT2	0.00101936
CDKN1A	0.00102074
MSI2	0.00102291
CTB.92J24.2	0.00102571
MSANTD3.TMEFF1	0.00102677
TMEFF1	0.00102677
TLE6	0.0010273
ZNF253	0.00102774
TSPAN4	0.00103068
ADCY6	0.00103369
LOXL4	0.00103989
MOXD1	0.00104036
RARRES3	0.00104332
NR2F2	0.0010469
OR7D2	0.00104699
AK026714	0.00105009
TP53INP1	0.00105241
ZNF175	0.00105349
RP1.228H13.5	0.00105456
SHB	0.0010584
GALNT11	0.00106042
CDS1	0.00106387
NUAK2	0.00106417
RBKS	0.00106532
LHFPL2	0.00106648
OBSL1	0.00106652
ST3GAL4	0.00107071
LGR4	0.0010747
ARHGAP27	0.00107552
AK056982	0.00107596
TRA2A	0.00107615
ZFY	0.00107803
HCCAT5	0.00107833
TRIB3	0.00108409
OSBPL1A	0.0010846
SEP_6	0.00108613
HOXB5	0.00108743
TBL1X	0.001088
SMAD7	0.00108811
LOC389834	0.00108946
UBE2G1	0.00109015
VAT1	0.00109416
EXT1	0.00109505
IMPA2	0.00109537
LOC100049716	0.00109833
GUSBP3	0.00109964
ENO2	0.00110007
CAMK2N1	0.0011051
MAGEH1	0.00110709
CPM	0.00110722
POMZP3	0.00110778
IGFBP3	0.00110966
ANXA3	0.00111488
JUP	0.00112051
PDCD6	0.00112695
GDF11	0.00112929
ZDHHC11	0.00112947
NNT.AS1	0.0011312
MAGI2.AS3	0.001132
PDLIM7	0.0011361
RP1.80B9.2	0.00113857
MLH1	0.00113901
NDC80	0.00114011
SLC16A6	0.00114052
C8orf44.SGK3	0.00114081
SGK3	0.00114081
CD53	0.0011415
LOC100287497	0.00114508
GKAP1	0.00114858
SPG20	0.00114944
IGF1R	0.00115153
ZNF823	0.0011523
FAM87A	0.00115377
FAM87B	0.00115377
ANKRD10	0.00115621
C4A	0.00115724
C4B	0.00115724
C4B_2	0.00115724
MUC1	0.00115753
KCTD12	0.00115788
NCKAP1	0.00115819
FZD6	0.00116278
TGFBR3	0.00116519
PAPSS2	0.00116754
WDR52	0.00117143
MAP3K14	0.00117148
S100A4	0.00117154
FAM89A	0.00117366
MIR1182	0.00117366
SAMHD1	0.00117463
LRRCC1	0.00117544
SPEF2	0.00118213
LINC00115	0.00118334
TNFSF13	0.00118535
TMCC3	0.00118616
F8A1	0.00119326
F8A2	0.00119326
F8A3	0.00119326
ADRBK2	0.00119609
TMEM44	0.00119642
LINC00116	0.00119832
FGD4	0.00119873
CD40	0.00120426
SEMA4B	0.00120858
KAZN	0.00121285
COLGALT2	0.00121668
STAMBPL1	0.00121695
LOC257152	0.001218
ZNF550	0.00121869
RP11.350F4.2	0.00122034
SPIDR	0.00122302
SLC31A2	0.00123149
SNX7	0.00123207
CLDN22	0.00123449
TMSB15B	0.00123582
ITPR2	0.00123613
PCDHA9	0.00123717
KLF5	0.00123851
NINL	0.00124009
AGMAT	0.00124478
FAM13A	0.00125189
SPAG16	0.00125199
DISP1	0.00125208
DBNDD1	0.00125241
SYNC	0.00125248
PBLD	0.00126351
PPAP2A	0.00126379
CEP70	0.0012656
LOC101930657	0.00126717
AQP3	0.00127078
BC065766	0.00127149
DUSP10	0.00127153
ZP3	0.00127829
RRM2	0.00127829
TRIM59	0.00128117
TMEM133	0.00128231
SLC30A4	0.00128235
TRPC1	0.00128415
H2BFS	0.00128516
LOC101927365	0.00129042
PTPRE	0.00129155
NT5DC2	0.00129282
AKAP7	0.00129552
ASPHD2	0.00129605
SOX13	0.00129611
WDR78	0.00130488
GLRX	0.00130793
PDE3B	0.00131011
ZNF518B	0.00131922
GAMT	0.00132052
ARID5B	0.00132077
TEX9	0.00132242
IDNK	0.00132446
PLIN2	0.00132519
EGR3	0.0013296
BC040901	0.00133305
CTC.241N9.1	0.00133305
LOC100996419	0.00133305
TNFAIP3	0.00133479
RHPN2	0.0013368
FAM83H	0.00134352
ZHX2	0.0013473
CROT	0.00135237
ZNF431	0.001353
SOX6	0.00135526
STK10	0.00135791
KAT2B	0.00135965
SLC18B1	0.00136298
ADORA2B	0.00136399
DDAH2	0.00136504
TTC28	0.00136702
LRRIQ3	0.00136727
BRI3BP	0.00136932
MAP3K9	0.00136952
XDH	0.00137229
TP53I3	0.0013723
SORBS1	0.00138827
THRB	0.0013918
FRK	0.00139516
KRTAP5.AS1	0.00139686
CLIP4	0.00140028
BCL2	0.00140117
NEBL	0.00140344
LOC100507507	0.00141014
TMSB15A	0.00141084
MYBL2	0.00141321
KCNK6	0.00141387
SOAT1	0.00141748
CPNE2	0.00142017
DDX58	0.00142221
TRIM45	0.00142554
TMEM216	0.0014283
ZNF280B	0.00143039
C20orf194	0.00143274
NAIP	0.0014347
RTN4R	0.00143562
HSBP1L1	0.00143896
LOC101927266	0.00144087
HIST1H2BK	0.00144095
ANXA1	0.00144932
HYI	0.0014498
CCDC109B	0.00145216
VEGFA	0.00145268
FAM210A	0.00145316
PLLP	0.00145559
LGALS8	0.00146204
APOC4	0.00146444
APOC4.APOC2	0.00146444
MCAM	0.00146521
GXYLT2	0.00147006
WWC1	0.00147342
ZNF83	0.00147392
PTPRS	0.00147505
HHLA3	0.00147732
ZNF595	0.00147917
PSMD6	0.00148575
LOC101930059	0.00148612
TTF2	0.00148774
CHRNA5	0.00149558
EHBP1L1	0.00150017
SSFA2	0.0015007
DPH6	0.00150504
INSIG1	0.00150626
FBXO32	0.00151515
ZNF284	0.00151621
TNS3	0.00151642
TCEAL8	0.00151733
TBC1D2	0.00152298
PERP	0.00152792
SKA1	0.00152843
FZD1	0.00152936
SETD6	0.00153085
TMEM67	0.00153159
CEACAM5	0.00153564
APOBEC3G	0.00153657
ANK3	0.00153753
IL17RD	0.00153776
NBEA	0.00153885
CYP2B6	0.00154506
TBC1D16	0.00154547
TLDC1	0.00154666
PSMB8	0.0015476
NPAS2	0.00154906
RP11.248J18.3	0.0015552
SEMA3C	0.00156496
BIVM	0.00156619
GNG12	0.00157163
LINC00667	0.00157265
SLC17A9	0.00158159
YAP1	0.0015818
PVRL2	0.00158608
SH3BP4	0.00158671
RHOB	0.00158732
FAM114A1	0.00159054
ATP10D	0.00159233
EFCAB4B	0.00159791
NREP	0.00159912
CYR61	0.00159975
FGF7	0.00160325
LRTOMT	0.00160334
SLC12A2	0.0016057
EPB41L1	0.00160639
TXNIP	0.00161169
PRADC1	0.00161371
RGS2	0.00161691
KIZ	0.00162071
LYST	0.00162339
KIAA1377	0.00162391
SPHK1	0.00162783
LOC643072	0.00162855
DPY19L2P2	0.00162969
NUDT1	0.00163767
SATB2	0.00163769
MIR6756	0.00163866
PELI1	0.00163923
SYBU	0.00164115
MALT1	0.00164369
MAP9	0.00164956
CEP128	0.00165217
CAAP1	0.00165327
CLYBL	0.00165457
MIR6787	0.0016565
SLC16A3	0.0016565
CENPM	0.00165665
MEIS3P1	0.00166129
GPR176	0.00166425
LOC389906	0.00166684
SPRY2	0.00166728
LOC729970	0.00166913
NXN	0.00167013
PIK3CD	0.00167089
TMEM2	0.0016782
AC083843.1	0.00167837
FAM43A	0.00167886
FMOD	0.00168463
NQO1	0.00168503
RP11.700J17.2	0.00169082
TMEM150C	0.00169131
LINC00921	0.00169307
ZNF263	0.00169307
MTBP	0.00169699
PARD6B	0.00169727
MIS18BP1	0.00169839
TMEM201	0.00170122
C2orf74	0.00170169
LOC101928403	0.00170287
ZBTB20	0.00170341
MOB3A	0.0017081
RAPH1	0.00171396
CDCA7L	0.00171593
PLAA	0.00171626
DOCK11	0.00171958
RBMS1	0.00172164
N6AMT2	0.0017286
CA12	0.00173057
GLS	0.00173229
CMTM8	0.00173272
KLF9	0.00173661
ZFYVE16	0.00174369
ARG2	0.00174437
ZNF85	0.00174455
FAHD2CP	0.00174602
NBR2	0.00175174
IRS2	0.0017585
ZNF432	0.00176612
DUSP5	0.0017669
CENPQ	0.00176852
PLEKHH1	0.00177154
ARMCX5	0.00177533
TPM1	0.0017775
SIX1	0.00178071
LPXN	0.00178263
DSE	0.00178647
RP11.138A9.1	0.00178682
LMO7	0.00178803
RP6.99M1.2	0.00178907
PRUNE2	0.00179172
DOCK5	0.00179258
CEP152	0.00179315
FAS	0.00179538
FAM46A	0.0017965
RNF217	0.00179836
PPP3CB.AS1	0.00179848
MET	0.00179913
TUBE1	0.00180006
ACO1	0.00180198
CBR1	0.00180344
AP1S3	0.00180476
SERPINA1	0.00180555
RNLS	0.00180774
CENPV	0.00181502
MOB3B	0.00181596
TRIB2	0.0018217
IFI44	0.00182311
RGL3	0.00182949
RDX	0.00183063
RGS20	0.00183114
BTN3A3	0.00183169
PEX6	0.00183301
COL27A1	0.00183415
CYLD	0.00184047
GGT1	0.00184328
FLVCR2	0.0018463
GPR160	0.00185291
STXBP4	0.00185428
CHM	0.00185497
SLC38A1	0.00185513
PAG1	0.001858
CAMK2D	0.00186049
MPC1	0.00186106
NCAPG	0.00186229
HMGA1	0.0018669
RORA	0.00186976
YPEL1	0.00186993
FAM126A	0.00187187
GCHFR	0.00187502
KITLG	0.0018765
RP11.199F11.2	0.00187761
OASL	0.00188218
OVOL2	0.00188277
RP11.391M1.4	0.00188394
JPH1	0.00188552
FKBP5	0.00188766
SOX5	0.00188997
JADE2	0.00189311
C1orf112	0.00189348
SNX16	0.00189532
LOC100289230	0.00189796
QKI	0.00189822
PRLR	0.00189832
LOC101928054	0.00190075
PCYOX1L	0.0019038
TP53TG3	0.00190631
TP53TG3B	0.00190631
TP53TG3C	0.00190631
TP53TG3D	0.00190631
SH3PXD2B	0.00191341
ACTA2	0.00191389
ENDOD1	0.00191477
CTBP2	0.00192163
STRN3	0.00192391
CYP2U1	0.00192523
EMP1	0.00192697
ZNF197	0.00192785
CNKSR1	0.00192827
AFAP1	0.00193304
RP11.533E19.7	0.00193411
PRSS23	0.00193501
MIR3916	0.0019387
ZNF512B	0.00195261
SETD7	0.00195364
CAT	0.00195614
TNFRSF10A	0.00195625
BC052775	0.00195743
ZNF700	0.00196096
MBOAT1	0.0019674
FZD8	0.00196927
MIR4683	0.00196927
SEC16B	0.00197234
TNFRSF21	0.00197531
LOC100996668	0.00199012
ZEB1	0.00199012
RPL39L	0.00199021
S100A6	0.00199027
SOCS3	0.0019915
PPP2R2B	0.00199478
ANKRD54	0.00199649
FBXO4	0.00199667
ZNF22	0.00200124
ASAP2	0.0020034
RBMS3	0.00200711
CHPT1	0.00200862
SPATA7	0.00201075
ETAA1	0.00201098
DIO2	0.00201182
ALDH2	0.00201442
GNE	0.00201735
SYT11	0.00202265
THEM4	0.00202673
INPP4B	0.00202968
CPT1A	0.0020338
GGT2	0.00203607
FRMD4A	0.00204561
FHIT	0.00204865
C5	0.0020495
CELSR1	0.00205348
SAMD4A	0.00205385
FXYD3	0.0020549
ZNF738	0.00205847
TMOD1	0.00205921
RPS6KA2	0.00206072
MPP2	0.00206361
EML1	0.00206696
MORF4L2.AS1	0.00206901
ZNF264	0.00206974
RIMS2	0.00207087
HIVEP3	0.0020732
ARL4D	0.0020749
PLA2G16	0.00207744
TACC2	0.00207807
PAM	0.0020822
CST3	0.00208376
DMD	0.00208402
CCDC134	0.00208927
CUL5	0.00209097
PDCD4	0.00209135
MLF1	0.00209289
ZNF862	0.00209524
NLRP1	0.00211166
MYO10	0.00211569
PTPRM	0.00211586
LOC100653149	0.00211881
LOC102725127	0.00211881
N4BP2	0.0021213
LOC101928717	0.00212363
COL7A1	0.00212467
CDH26	0.00212472
STEAP1	0.00212618
ENPP4	0.00212888
MREG	0.00213005
HAPLN3	0.00213058
TCEA2	0.00214031
SLC25A37	0.00214057
LOC389831	0.0021406
TMSB4X	0.00214068
SMIM3	0.00214087
GUCY1A2	0.00214187
EXPH5	0.00214454
KDM6A	0.00214758
GGTLC1	0.00215054
ZNF140	0.00215857
TRIM16	0.0021594
VRK1	0.00215948
PPM1L	0.00216074
TSPAN13	0.00216111
TRIB1	0.00216156
PTPN7	0.00218207
PSD3	0.00218399
ZNF529	0.00219031
ARHGAP29	0.00219073
ZNF827	0.0021911
TMC5	0.00219242
SAMD13	0.00219295
GSTM3	0.00219851
IFITM3	0.00220518
FLRT3	0.00220832
ZFP36	0.00221345
LOC100506730	0.00221805
TP53TG1	0.00222419
ANK2	0.00223324
LINC00969	0.00223407
TRMT12	0.0022351
LRP5	0.00223632
SIPA1L2	0.00223665
BDH2	0.0022373
MAP3K8	0.00224558
ANXA2R	0.00224841
LMCD1	0.00224966
ESCO2	0.00225199
DRAM1	0.00225631
RAD51	0.00225702
NUAK1	0.00225805
ANKRD55	0.00226579
FRMD6.AS1	0.00226691
FGD6	0.00226917
CHST3	0.00226963
SLC26A2	0.00227104
LINC00326	0.00227271
AF520793	0.00227446
CEP85L	0.00227526
EGR1	0.0022768
TMLHE	0.0022809
CABLES1	0.00228172
TPM4	0.00228894
KLHL5	0.00229046
MIR4435.1HG	0.00229798
LTB4R	0.00230526
FBXO25	0.00230585
FAM169A	0.00230868
TNFSF12.TNFSF13	0.0023155
LAMB2	0.00231623
HIST1H2BG	0.00231993
PRAF2	0.00232035
ZNF785	0.00232267
HOXB6	0.00232732
TLE4	0.00232806
E2F5	0.00233137
TMTC2	0.00233203
KLF12	0.00233333
ANP32A.IT1	0.00233347
RASA4	0.00233377
RASA4B	0.00233377
CMTM7	0.00233504
LINC00520	0.00233513
TIGD7	0.00233591
IGLC1	0.00234093
ZNF41	0.00234117
MYO1B	0.00234128
GRAMD3	0.00234267
RELL1	0.00234296
NEIL3	0.00234372
ABCA17P	0.00234468
INTU	0.00234704
HIST1H3B	0.00235058
TRAPPC6A	0.00235615
TAGLN	0.00235671
TTC39B	0.00235842
DDX26B	0.00235872
ITGB3	0.00236482
DNAJC6	0.0023676
DDX60L	0.00236943
ZNF43	0.00237027
NR4A2	0.0023704
VDR	0.00237146
TTC39C	0.00238191
EPB41L4B	0.00238569
AGPAT9	0.0023862
EDNRB	0.00239068
DHRSX	0.0023941
ACSL1	0.00239493
ME1	0.00240434
NUDT19	0.00240561
MYEF2	0.0024115
ANKRD9	0.00241282
GGTLC2	0.00241301
LOC728730	0.00241594
HTATIP2	0.0024163
LOC102723864	0.00241712
FGFR2	0.00241859
GDAP1	0.00242286
MID2	0.00242426
NUP210	0.00242866
EPSTI1	0.00243077
FXYD5	0.0024311
ZNF546	0.00243193
DNMT3B	0.00243363
ITGB5	0.00244032
LOC101927705	0.00244367
P4HA2	0.00244367
APOBEC3B	0.00244495
S100A11P1	0.00244507
TFAP2A	0.00244513
SORL1	0.00244674
ZBTB18	0.00244804
FAT4	0.00245307
KRT18	0.00245311
F8	0.00245333
LOC284219	0.0024566
NETO2	0.00245707
H1F0	0.00245835
HLA.DMB	0.00245968
ABHD3	0.00246746
DNAJC18	0.00246759
C2CD2	0.00246805
PLCG2	0.0024713
MPP7	0.00247149
LILRB4	0.00247234
MFSD9	0.00247742
ZNF532	0.00248371
MTAP	0.00248462
RUSC1.AS1	0.00248608
RAB15	0.00248834
ZNF655	0.0024885
UCP2	0.00249143
ARL4C	0.00249244
EME2	0.00249343
NUDT13	0.0024977
PDK3	0.00249948
SLC19A2	0.00250075
LOC401068	0.00250378
TGFB2	0.00250864
PDGFC	0.00250906
ABCC4	0.00250994
MAGEE1	0.00251011
LIMS3	0.00251129
CXXC5	0.00251334
HDAC9	0.00251383
PPP1R18	0.00251519
FOXC1	0.00251625
ZNF814	0.00251727
MLLT11	0.00251974
NET1	0.00252124
PRKAR2B	0.00252224
MYO5C	0.00252967
PRRG4	0.00253462
CTSC	0.00253759
CMBL	0.00256048
FAM228B	0.00256321
METAP1D	0.00256391
ZNF608	0.00256762
S100A11	0.0025715
AHR	0.00257623
RTN2	0.00257636
ARRDC1	0.00258011
ZNF462	0.00258098
LOC102724229	0.00258283
HELLS	0.00258532
ID1	0.00258641
BLVRB	0.00258769
OR2A20P	0.00258795
OR2A9P	0.00258795
FAM53A	0.00259279
OSBPL3	0.00259391
IGF2BP3	0.00259783
SOX4	0.00260161
EOMES	0.00260209
TUBB2A	0.00261569
ARHGAP32	0.00261654
NANOS1	0.00261698
MEST	0.00262072
GATM	0.00262133
SLC22A18	0.00262478
PLEKHH2	0.00262624
PHKA1	0.00264413
PARVA	0.00264756
DENND1B	0.00265047
MARCKSL1	0.00265362
CLMN	0.00265536
ASPH	0.00265892
L3MBTL1	0.00266331
BCL3	0.00267865
MIR8085	0.00267865
GEN1	0.00268108
IRAK2	0.00268672
UGT1A10	0.0026886
UGT1A4	0.0026886
SNN	0.00268915
RAB13	0.00269414
MTCL1	0.00270427
C2orf43	0.00271774
NRDE2	0.00272015
BOLA1	0.0027221
PNP	0.00272752
PCBD1	0.00273148
CD55	0.00274044
AFAP1L1	0.0027442
SLC44A1	0.00274579
DOPEY2	0.00274814
OXCT1	0.00275496
FOCAD	0.00275507
TBX6	0.00276361
WNK3	0.00277007
HSD17B11	0.00277757
SMPDL3A	0.00278067
PDCD10	0.00278108
GFOD1	0.00278337
EIF5A	0.00278716
AX747132	0.00279005
RP11.458D21.1	0.00279005
RP4.791M13.3	0.00279005
ZHX3	0.00279336
PLXND1	0.00279492
LAMB1	0.00279492
SESTD1	0.00279865
RAD51AP1	0.00279904
GMDS	0.00279927
RAB31	0.00280021
GCNT1	0.0028009
TMEM170B	0.00280187
ADD3	0.00280298
IFI16	0.00280621
CENPJ	0.00280651
KRT86	0.00280709
LOC100509764	0.00280709
APLF	0.00281177
FAM174B	0.00281238
RASEF	0.00281797
ZNF141	0.00282918
RAB27B	0.00282947
BBS9	0.00283183
ZNF14	0.0028405
LY6E	0.00284548
ELK3	0.00284635
NUCB2	0.00284715
WBP5	0.00285043
MCTP1	0.00285839
GSTM1	0.00286093
WIPF1	0.00286529
CKB	0.00287169
ZNF512	0.00287751
GATSL3	0.00289091
CTC1	0.00289257
DNER	0.00289831
EMP3	0.00290431
HIF1A	0.00290621
NAAA	0.00290648
PRMT6	0.00290736
ITGA10	0.00290759
TMEM254	0.0029092
ARMC9	0.00291613
LRFN3	0.00292179
TNFAIP8	0.00292429
CD9	0.00292971
MAPRE2	0.00293017
C4orf33	0.00293155
LOC102724884	0.00293289
ZNF33B	0.00294241
MR1	0.0029466
CERS6	0.00294905
NEDD4L	0.00295075
ZBTB45	0.00295108
DICER1.AS1	0.00295173
ZKSCAN4	0.00295525
SORT1	0.00295927
NQO2	0.00296379
LTBP1	0.00296996
LOH12CR1	0.00298295
RP11.247L20.4	0.00298805
QPRT	0.00299595
NOL3	0.00300007
IL1R1	0.00300627
NNT	0.0030094
CDKAL1	0.00302799
KGFLP1	0.00303234
ZBTB25	0.00304143
LOC101928635	0.00304549
C9orf64	0.0030497
EPM2AIP1	0.00305277
LOC100996251	0.00305858
CDON	0.00306172
ZCCHC2	0.00306181
LGMN	0.00306666
BACE2	0.00306674
PARP9	0.00306799
LITAF	0.00306897
MBNL1.AS1	0.00307672
DGKQ	0.00307704
LINC00936	0.00308323
SLC23A2	0.00308401
FZD5	0.00308503
MFSD3	0.00309534
FBXL7	0.0031029
ZNF697	0.0031088
NCOA3	0.00310885
TP53INP2	0.00311615
MT1G	0.00311622
SMAD9	0.00312175
AK9	0.00312608
RASSF8	0.00312933
KCTD6	0.00312968
GSTM2	0.00313007
PTPN21	0.00313109
DKK2	0.0031312
GSTA4	0.00313507
MAP3K5	0.003137
LRRC49	0.00313961
SLC19A1	0.00314068
ROBO1	0.00314537
TCTEX1D2	0.00314716
GPR137B	0.00315412
FSTL3	0.00315596
UST	0.00315828
TRIM5	0.00316083
GRAMD1C	0.00316394
ZNF420	0.00317074
VAMP8	0.00317208
ECHDC1	0.00317723
FJX1	0.00318104
NRP2	0.00318145
AKR1B1	0.00318226
POLE2	0.0031839
CTSO	0.00318402
COL6A1	0.00319126
NRIP3	0.00320022
KIAA0922	0.00320118
HMGN5	0.00320554
PANK1	0.00321584
CACNA1A	0.00321985
LOC100507353	0.00321985
SOCS2	0.0032207
CIT	0.00322431
MIR1178	0.00322431
BHLHE40	0.00322697
CDRT4	0.00322945
TVP23C.CDRT4	0.00322945
HMGA2	0.00323341
DAPP1	0.0032352
TNFRSF11A	0.00323525
HIST1H4H	0.00323557
LOC153684	0.00323991
ARPIN	0.00324594
IGSF3	0.00324796
PPP1R3B	0.00325057
INPP5B	0.00325364
CNTNAP3P2	0.00326055
STAT5B	0.00326692
SSBP2	0.00326877
MAML3	0.00326965
SYTL2	0.00327189
GSDMD	0.00327459
RCAN1	0.00327741
PTPLA	0.00328152
DAAM1	0.00328434
TUBB2B	0.00328716
CA13	0.00328836
LOC100507258	0.00328836
IMMP2L	0.00328965
MEGF9	0.00329662
TNIK	0.00329695
ELF4	0.00329812
DEPDC1B	0.00329897
TGFA	0.00331221
AL832909	0.00331391
DDR2	0.0033157
EHHADH	0.00331896
NABP1	0.00332972
CDT1	0.00333272
LINC00963	0.00333888
PTK7	0.00334192
SLC7A11	0.00334558
UBL7.AS1	0.00334608
SNX10	0.00334656
POLI	0.00334729
APP	0.00335055
PRICKLE1	0.00335433
DHRS3	0.00335477
SPIN3	0.00335661
TEP1	0.00336711
RTKN2	0.00337818
HLA.F.AS1	0.00338188
EPB41L2	0.00338307
LINC00984	0.00338653
FAM161A	0.00339292
DCBLD1	0.00339493
CITED2	0.00339651
MTG1	0.00339817
GBA	0.00339869
CTDSPL	0.00340426
TUBA4A	0.00340563
BEX2	0.00340808
ETS2	0.0034109
NPR2	0.00341912
ZNF117	0.00342478
TWSG1	0.00343581
A2M	0.00343807
FZD2	0.00344693
RRN3P2	0.00346054
NAV2	0.00346579
TSHZ1	0.0034685
CAP2	0.00347767
LPIN2	0.00347776
ZNF248	0.00348191
RP5.1074L1.4	0.00348454
HMGCS2	0.00348488
AUTS2	0.00349356
SVIL	0.00350386
TAPT1.AS1	0.00350552
CDK5R1	0.00350637
ABHD6	0.00350963
KIAA1524	0.00351137
NRIP1	0.0035148
MINOS1.NBL1	0.00351598
NEK3	0.00351846
ATF5	0.00352646
ALDH3B1	0.00352724
HOXA3	0.00352921
ZNF268	0.00353758
LINC01312	0.00354393
AGTPBP1	0.00354673
LRP12	0.00355138
LOC101926921	0.00355507
RIMKLA	0.00355984
MIR1204	0.00356286
PVT1	0.00356286
TP73.AS1	0.00356845
NUDT12	0.00356988
PLSCR4	0.00358236
CD276	0.0035886
FHL2	0.00359127
OSTM1	0.00359133
ENC1	0.00359646
PTPRG	0.00360422
CHD7	0.00360535
GNG7	0.00360965
LIMCH1	0.00361293
TRIM68	0.00361377
GBAP1	0.00362294
FAM171B	0.00362307
SLC44A2	0.00362428
VAMP1	0.00363158
NUF2	0.00363861
SCML1	0.00364678
PGAP1	0.00365045
LOC101926916	0.00365572
RPARP.AS1	0.00365818
FAM27E2	0.00366534
FAM27E3	0.00366534
UBE2C	0.00367468
ANKRD36B	0.00367555
CADM2	0.00367745
HOXB3	0.0036926
SAMD9L	0.00370561
LEPR	0.00370859
HNMT	0.00371434
MIR22	0.00371951
MIR22HG	0.00371951
HIP1	0.00372913
IFT74	0.00374782
RND3	0.00374788
FADS1	0.00375042
MIR1908	0.00375042
LOC728613	0.00375043
SPIRE1	0.00375072
NUDT7	0.00375398
CDKN2C	0.00376221
SFXN2	0.00378302
HIST1H2BE	0.00378705
ZBED3	0.00378919
NOL4L	0.00378972
HIVEP2	0.00379955
LINC01003	0.0038032
MMRN2	0.00380549
SIGMAR1	0.00380666
C1orf53	0.00380972
NOV	0.00381036
FNBP1	0.00381549
CREB5	0.00383282
SLC35D2	0.00383283
LINC00673	0.0038339
MLPH	0.00383683
STARD10	0.00384218
GPR155	0.00384321
ADCY7	0.00384526
CDC42EP1	0.00384546
ST3GAL4.AS1	0.00384589
RP1.151F17.2	0.00384728
MCOLN1	0.00384943
RNF139.AS1	0.00385863
PPAP2C	0.00385886
KATNAL1	0.00386104
ZNF850	0.00386136
DUXAP10	0.00386294
C4orf32	0.00386733
TRIM3	0.0038781
ZNF607	0.00388154
TIAM1	0.00388354
PSEN2	0.00389147
NEDD9	0.00389329
SWAP70	0.00389584
TIAM2	0.00390142
ICAM3	0.00390283
HRSP12	0.00390646
FRAT2	0.00391425
HIST1H2BC	0.00391988
PMAIP1	0.00392052
L3MBTL3	0.00392752
HSPA1L	0.00393406
CPEB2	0.00393798
CTNNBIP1	0.00394101
MYLIP	0.00394302
MERTK	0.00396002
MYO1E	0.00396481
PITPNC1	0.00396567
CASP1	0.00396603
HOXA13	0.00397555
AUNIP	0.00397578
TBC1D4	0.00397696
FHDC1	0.00397705
LOC101929147	0.00397849
SOCS6	0.00398591
ZNF10	0.00399094
PGBD1	0.00399102
ATP6V0D2	0.0039911
MT1E	0.00399206
PHLDB2	0.00399416
AHRR	0.00399851
BTBD3	0.00400417
MMP14	0.00400551
MSRB3	0.00400764
SMAD6	0.00401073
DFFB	0.00401145
UGT1A6	0.00401933
CD59	0.00402924
PRDX2	0.00403384
C16orf62	0.00403409
PYGB	0.00404084
GALC	0.00404093
LINC00888	0.00404225
HDAC11	0.00404441
LINC01296	0.00406094
PDGFA	0.00406205
HDAC4	0.00406635
HGSNAT	0.00406695
KIAA1211	0.00406803
FABP5	0.00407723
EIF5A2	0.00408172
HECTD2	0.00408427
SLC7A5P2	0.00409143
LOC401317	0.00409286
LOC285147	0.00410675
PBX3	0.00410914
TAZ	0.00411224
GHDC	0.00411579
LCA5	0.00411737
PHLDA1	0.00411948
RASA3	0.00412181
CTD.2292M16.8	0.00412877
LINC00511	0.00413209
TMX3	0.00413814
GAS2L1	0.00414052
AKR1C3	0.00414431
SLC2A11	0.0041463
DDIT3	0.00414653
LRIG3	0.00414773
DENND5A	0.00414865
MAP7D3	0.00415432
LINC00467	0.00415869
RAB11B.AS1	0.00415908
FAM117A	0.00416584
STOM	0.00418501
PTPN3	0.0042023
RHOBTB1	0.00420435
TANC1	0.00420888
ZNF443	0.00421128
DSC2	0.00421755
MAP3K13	0.00421838
ZBED3.AS1	0.00421917
APOC2	0.00423497
CELSR3	0.00423723
DHCR7	0.00424611
MEX3A	0.00425262
MIR6513	0.00425894
TMBIM1	0.00425894
TMEM159	0.00426277
UBE2L6	0.00426433
SP140L	0.00428244
SPIN2B	0.00428392
SVIP	0.00428582
LINC00665	0.00430138
HIST2H2BE	0.00430641
KGFLP2	0.00430949
MT1F	0.00431072
CEP112	0.00431125
IKBIP	0.00431202
PLD1	0.00431223
ZNRD1.AS1	0.00431272
USP18	0.00431406
PVRL3	0.00431568
DLEU2L	0.00431699
TIFA	0.00432568
TNK1	0.00433151
[truncated: 1,025 more rows]
